1  
2  
3  
4  
5  
6  
7  
8  
9  
10  
11  
12  
13  
14  
15  
16  
17

# Metabolic competition between lipid metabolism and histone methylation regulates sexual differentiation in human malaria parasites.

Chantal T. Harris<sup>1,2</sup>, Xinran Tong<sup>1,3</sup>, Riward Campelo<sup>1</sup>, Maria I. Marreiros<sup>4,5</sup>, Leen N. Vanheer<sup>1</sup>, Navid Nahiyaan<sup>6</sup>, Vanessa A. Zuzarte-Luís<sup>4</sup>, Kirk W. Deitsch<sup>1</sup>, Maria M. Mota<sup>4</sup>, Kyu Y. Rhee<sup>1,6</sup>, Björn F.C. Kafsack<sup>1\*</sup>

- <sup>1</sup> Department of Microbiology & Immunology, Weill Cornell Medicine, New York, USA.
- <sup>2</sup> Immunology & Microbial Pathogenesis Graduate Program, Weill Cornell Medicine, New York, USA.
- <sup>3</sup> BCMB Allied Graduate Program, Weill Cornell Medicine, New York, NY 10065, USA.
- <sup>4</sup> Instituto de Medicina Molecular João Lobo Antunes, Faculdade de Medicina Universidade de Lisboa, Lisbon, Portugal.
- <sup>5</sup> Instituto de Ciências Biomédicas Abel Salazar (ICBAS), Universidade do Porto, Porto, Portugal.
- <sup>6</sup> Division of Infectious Diseases, Weill Department of Medicine, Weill Cornell Medicine, New York, USA.

\* Please send correspondence to [bjk2007@med.cornell.edu](mailto:bjk2007@med.cornell.edu)

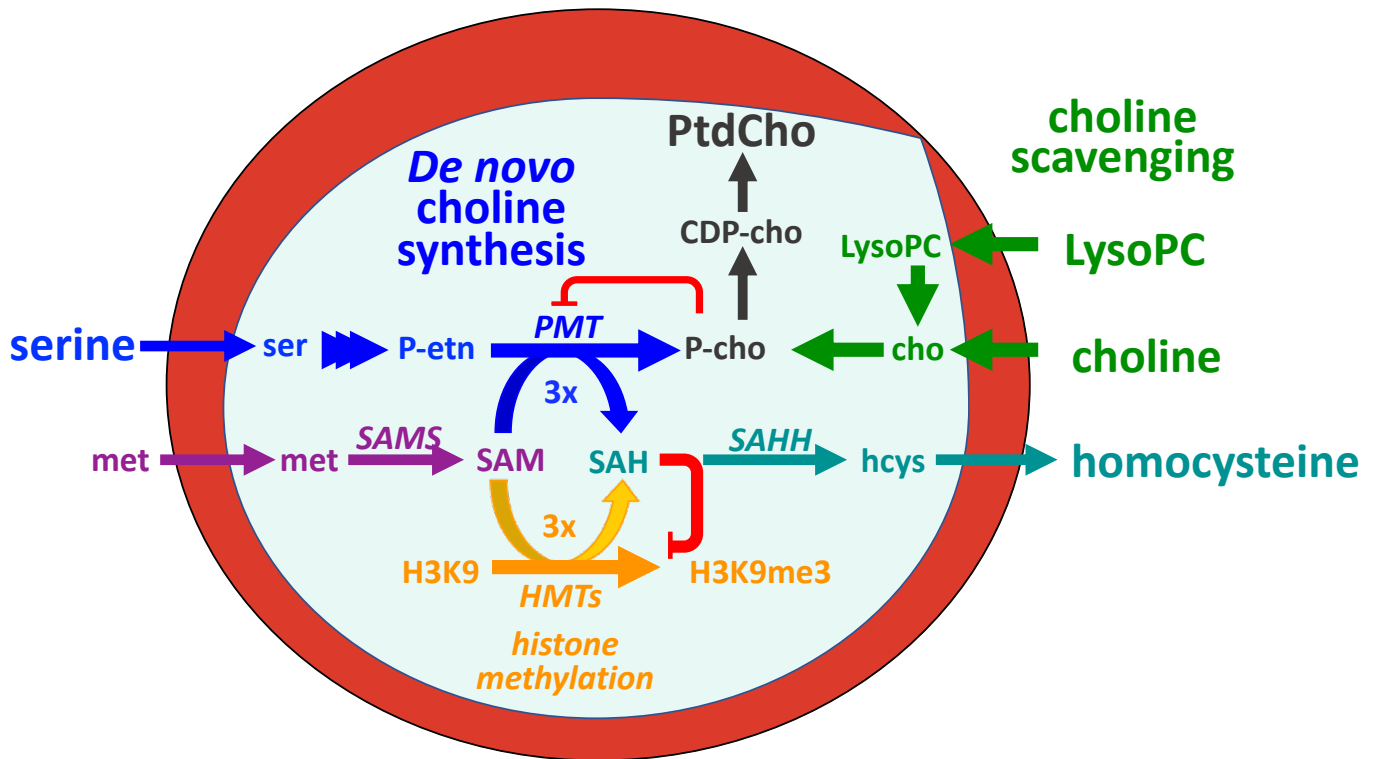

18

## 1 ABSTRACT

2 For *Plasmodium falciparum*, the most widespread and virulent malaria parasite that infects humans,  
3 persistence depends on continuous asexual replication in red blood cells, while transmission to their mosquito  
4 vector requires asexual blood-stage parasites to differentiate into non-replicating gametocytes. This decision  
5 is controlled by stochastic de-repression of a heterochromatin-silenced locus encoding *PfAP2-G*, the master  
6 transcription factor of sexual differentiation. The frequency of *pfap2-g* de-repression was shown to be  
7 responsive to extracellular phospholipid precursors but the mechanism linking these metabolites to  
8 epigenetic regulation of *pfap2-g* was unknown. Here we show that this response is mediated by metabolic  
9 competition for the methyl donor S-adenosylmethionine between histone methyltransferases and  
10 phosphoethanolamine methyltransferase, a critical enzyme in the parasite's pathway for *de*  
11 *novo* phosphatidylcholine synthesis. When phosphatidylcholine precursors are scarce, increased consumption  
12 of SAM for *de novo* phosphatidylcholine synthesis impairs maintenance of the histone methylation  
13 responsible for silencing *pfap2-g*, increasing the frequency of derepression and sexual differentiation.

## 16 KEYWORDS

17 malaria; *Plasmodium falciparum*; differentiation; metabolism; chromatin; metabolic epigenome; methylation;

## 20 ABBREVIATIONS

21 *3-DZA*: 3-deaza-adenosine; *cho*: choline; *CDP-cho*: cytidine diphosphate-choline; *CK*: choline kinase; *GlcNAC*:  
22 N-acetyl glucosamine; *Glm*: glucosamine; *hcys*: homocysteine; *iRBC*: infected RBC; *LysoPC*: lyso-  
23 phosphatidylcholine; *met*: methionine; *P-cho*: phospho-choline; *P-etn*: phospho-ethanolamine; *P-etn-me1/2*:  
24 mono/di-methylphosphoethanolamine; *PMT*: phosphoethanolamine methyltransferase; *PtdCho*:  
25 phosphatidylcholine; *RBC*: red blood cell; *SAH*: S-adenosylhomocysteine; *SAHH*: S-adenosylhomocysteine  
26 hydrolase; *SAM*: S-adenosylmethionine; *SAMS*: S-adenosylmethionine synthetase; *ser*: serine; *TMP*:  
27 trimethoprim; *uRBC*: uninfected RBC.

## 1 INTRODUCTION

2 Transmission of malaria parasites requires differentiation from replicating asexual blood-stream forms that  
3 are responsible for pathogenesis into non-replicating sexual stages, called gametocytes, that can infect the  
4 mosquito vector. Parasite success depends on a careful balance between asexual replication, to maintain  
5 human infection, and gametocyte formation, to infect the mosquito vector for further transmission. The  
6 regulation of this balance is key to understanding the dynamics of malaria pathogenesis and transmission <sup>1</sup>.  
7 Developmental commitment to sexual differentiation requires expression of the transcription factor AP2-G  
8 <sup>2,3</sup>. This requires the transcriptional activation of the *ap2-g* locus, which is actively silenced in a  
9 heterochromatin-dependent manner during asexual replication <sup>2,4-6</sup>. The frequency of sexual differentiation  
10 relies on effective heterochromatin maintenance at the *ap2-g* locus, which depends on the efficient  
11 trimethylation of lysine 9 on histone H3 of newly placed nucleosomes and recognition of this mark by  
12 heterochromatin protein 1 <sup>2,7-9</sup>. So long as *ap2-g* remains efficiently silenced, parasites continue replicating  
13 asexually. However, AP2-G has several binding-sites within its own promoter that creates a positive  
14 transcriptional feedback loop once AP2-G expression rise beyond a threshold. When heterochromatin  
15 maintenance is impaired, leaky silencing allows AP2-G expression to exceed that threshold in a greater  
16 proportion of cells, leading to the activation of the feedback loop. This drives AP2-G expression to high levels,  
17 resulting in sexual commitment and activating the transcriptional program underlying gametocytogenesis <sup>2,10-</sup>  
18 <sup>13</sup>.

19 In the laboratory, the frequency of sexual commitment of *Plasmodium falciparum*, the most wide-  
20 spread and virulent human malaria parasite, varies from less than 1% to greater than 40% in response to  
21 culture conditions, including parasite density and media composition <sup>14</sup>. Recent work showed that  
22 lysophosphatidylcholine (LysoPC) and choline, precursors of phosphocholine (P-cho), the headgroup required  
23 for phosphatidylcholine (PtdCho) synthesis, act as potent suppressors of sexual commitment <sup>15</sup>. This ability of  
24 parasites to vary their investment into gametocyte production illustrates the parasites' ability to sense their  
25 in-host environment and respond adaptively to resource abundance <sup>16</sup> or anatomical niche <sup>17,18</sup>. However, the  
26 underlying mechanisms that link the availability of these metabolites to *pfap2-g* activation remain unknown.  
27 Here, we show that the availability of P-cho precursors regulates sexual commitment by shifting the metabolic  
28 competition for the methyl donor S-adenosyl methionine (SAM) between the methyltransferase required for  
29 *de novo* synthesis of P-cho and the histone methyltransferases maintaining heterochromatin-mediated  
30 silencing, including at the *ap2-g* locus.

31

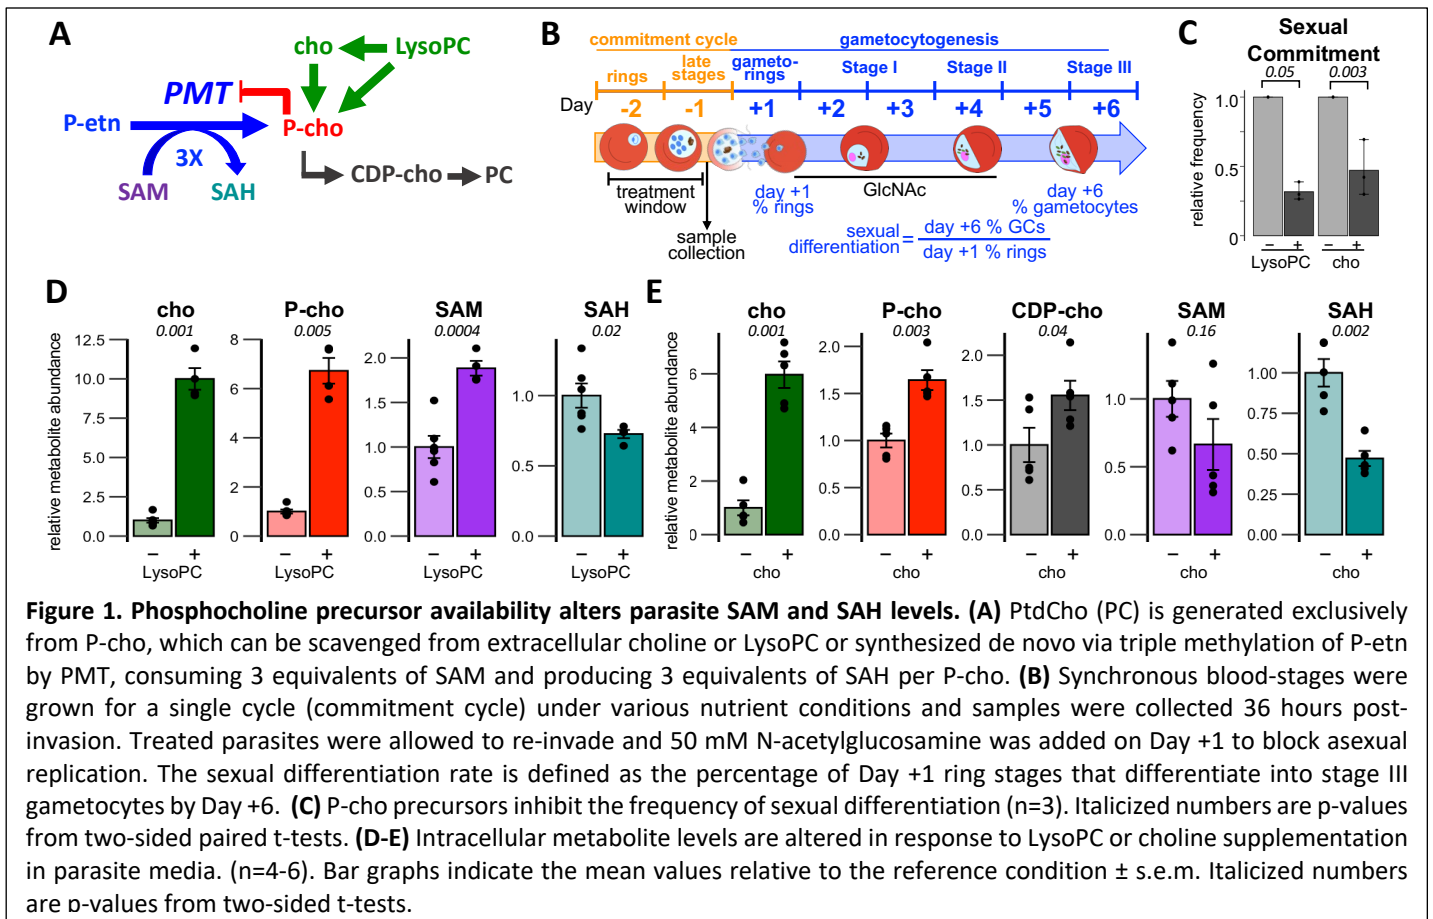

1 **P-cho precursor availability alters sexual commitment and intracellular concentrations of SAM and SAH.**  
2 As the parasite grows during its 48-hour asexual replication cycle, the membrane content of infected red  
3 blood cells (iRBCs) increases 8-fold, with PtdCho accounting for more than half of this increase in membrane  
4 biomass<sup>19,20</sup>. In *P. falciparum*, PtdCho is exclusively derived from P-cho, which can be generated *de novo*  
5 from serine via phosphoethanolamine (P-ethn) or scavenged from extracellular sources, including choline and  
6 choline-containing phospholipids such as LysoPC<sup>21</sup> (Figure 1A, Extended Data Figure 1).  
7 Consistent with earlier reports<sup>15</sup>, we found that supplementation of standard malaria growth media  
8 with exogenous P-cho precursors (see Extended Data Table 1 for media composition) during a single  
9 replication cycle substantially suppressed sexual commitment (Figure 1B-C) and increased the levels of P-cho  
10 and CDP-choline within iRBCs compared to conditions when these precursors were scarce (Figure 1D-E,  
11 Extended Data Figure 2). As we had previously described<sup>2</sup>, the change in *ap2-g* expression at the end of this  
12 cycle tracked closely with the observed changes in sexual commitment (Extended Data Figure 3).  
13 When exogenous P-cho precursors like choline or LysoPC are available for scavenging, parasite levels  
14 of SAH decreased significantly compared to conditions requiring greater *de novo* synthesis of P-cho from P-  
15 ethn (Figure 1D-E). SAM levels increased in response to LysoPC but remained unchanged upon choline  
16 supplementation. A possible explanation for this difference is the additional energetic cost associated with

1 scavenging choline, which must be phosphorylated using ATP, while LysoPC can be cleaved directly into P-cho  
2 by phospholipase C. This is supported by the observation that the suppressive effects of choline  
3 supplementation can be reversed by reducing the availability of glucose within the growth medium <sup>15</sup>. This  
4 metabolic response to P-cho precursors is dose dependent (Extended Data Figure 2) indicating that P-cho  
5 precursor availability regulates intracellular levels of SAM and SAH. These changes in intracellular levels of P-  
6 cho, SAM, and SAH were limited to iRBCs and did not occur in uninfected RBCs (Extended Data Figure 4).

### 8 **Phosphoethanolamine methyltransferase activity drives the changes in intracellular SAM and SAH.**

9 Earlier work by the group of Choukri ben Mamoun showed that in malaria parasites *de novo* synthesis of  
10 PtdCho's choline headgroup is carried out by (PMT), which generates P-cho by transferring three consecutive  
11 methyl-groups from the methyl-donor S-adenosylmethionine (SAM) onto P-etn <sup>21,22</sup>, and that malaria blood  
12 stages substantially down-regulate *pmt* in response to supplementation with P-cho precursors <sup>23</sup> (Figure 2A).  
13 Since *de novo* synthesis of the choline headgroup is a major consumer of SAM and source of S-adenosyl  
14 homocysteine (SAH) in other eukaryotes <sup>24</sup>, we wanted to assess whether the observed changes in SAM and  
15 SAH were due to a decrease in PMT activity. Consistent with the earlier reports, we observed a significant  
16 decrease in the abundance of the mono- and di-methylated P-etn reaction intermediates generated by PMT  
17 when cultures were supplemented with choline and found that PMT transcript abundance was substantially  
18 lower under this condition (Figure 2B). The effect of PMT activity on overall intracellular SAM and SAH levels  
19 was unclear but if P-cho synthesis by PMT is a major metabolic sink of SAM and source of SAH, their levels  
20 should correlate with PMT activity. To test this connection between PMT activity, SAM metabolism and sexual  
21 commitment, we generated inducible PMT knockdown parasites by inserting the glucosamine-responsive  
22 autocatalytic *glmS* ribozyme <sup>25</sup> into the endogenous PMT 3'UTR (Extended Data Figure 5). Treatment of PMT-  
23 *glmS* cultures with glucosamine during the commitment cycle reduced PMT protein levels by 55% (Figure 2D),  
24 resulting in a 2-fold increase in intracellular SAM and significantly suppressed sexual commitment, even in the  
25 absence of P-cho precursors (Figure 2E-F). This fits with earlier reports that found a near complete suppression  
26 of gametocytogenesis in *pfpmt* knockout parasites that was restored to parental levels upon genetic  
27 complementation <sup>25,26</sup>.

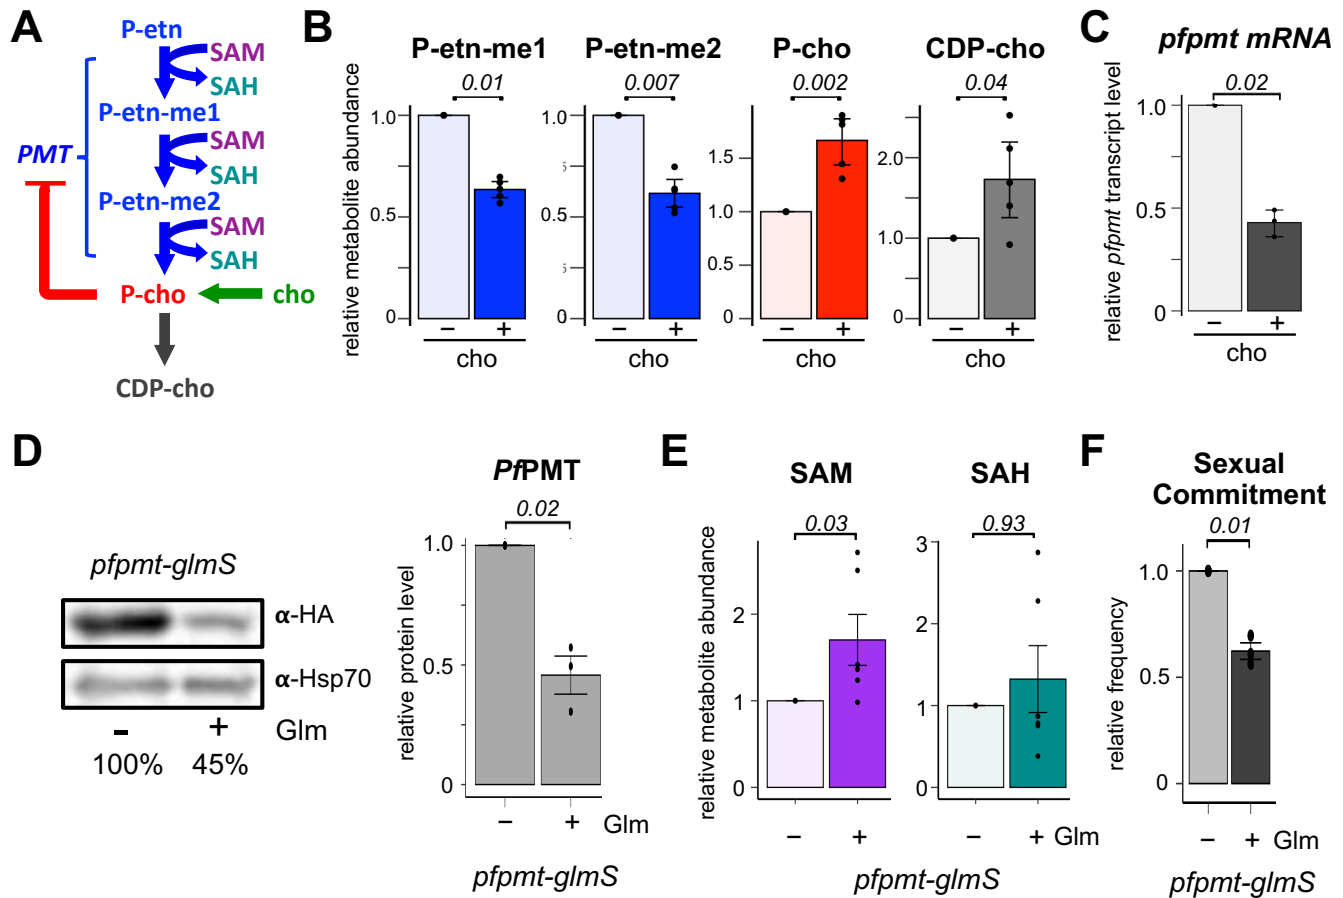

**Figure 2. De novo synthesis of P-cho by PMT is a major sink of SAM and source of SAH.** (A-C) Increases in P-choline from choline scavenging downregulates *PMT* activity as indicated by decreases in the monomethyl- and dimethyl-phospho-ethanolamine (P-ethn-me1/2) reaction intermediates (B, n=4) and *PMT* transcript levels (C, n=3). Transcript abundance was normalized to seryl-tRNA synthetase transcript and shown relative to no choline supplementation. (D) Inducible knockdown of *PMT* upon addition of 2.5 mM glucosamine (Glm) in *PMT*-glmS parasites significantly reduces *PMT* protein abundance relative to PfHSP70 loading control. (n=3) (E) Knockdown of *PMT* increases intracellular SAM levels (n=6). (F) Knockdown of *PMT* reduces sexual commitment even in the absence of P-cho precursors. (n=3) Bar graphs indicate the mean values relative to the reference condition  $\pm$  s.e.m. Italicized numbers are p-values from two-sided paired t-tests.

## 1 Intracellular SAM levels regulate sexual commitment.

2 To determine whether these changes in SAM and SAH abundance merely correlate or directly regulate sexual  
 3 commitment, we aimed to manipulate the intracellular concentrations of SAM and SAH independently of *PMT*  
 4 activity and P-cho precursor abundance. We reasoned that if the availability of P-cho precursors suppresses  
 5 sexual commitment by reducing *PMT*'s consumption of SAM, then this suppression should depend on the  
 6 overall availability of SAM, which in malaria parasites is solely generated from methionine by SAM synthetase  
 7 (SAMS). Malaria parasites are methionine auxotrophs and, unlike most eukaryotes, lack orthologs to enzymes  
 8 able to regenerate methionine from homocysteine<sup>26</sup>, making parasite SAM synthesis fully dependent on  
 9 methionine derived from extracellular pools and the break-down of host cell proteins (Figure 3A). While  
 10 removing extracellular methionine substantially decreased intracellular methionine and SAM (Figure 3B), it

1 had no discernable effect on parasite replication over a two-week period (Extended Data Figure 6). However,  
 2 while in standard growth medium containing 100  $\mu$ M methionine, choline significantly suppressed  
 3 commitment, this suppressive effect was greatly reduced when methionine was removed from the growth  
 4 media for even a single commitment cycle (Figure 3C).

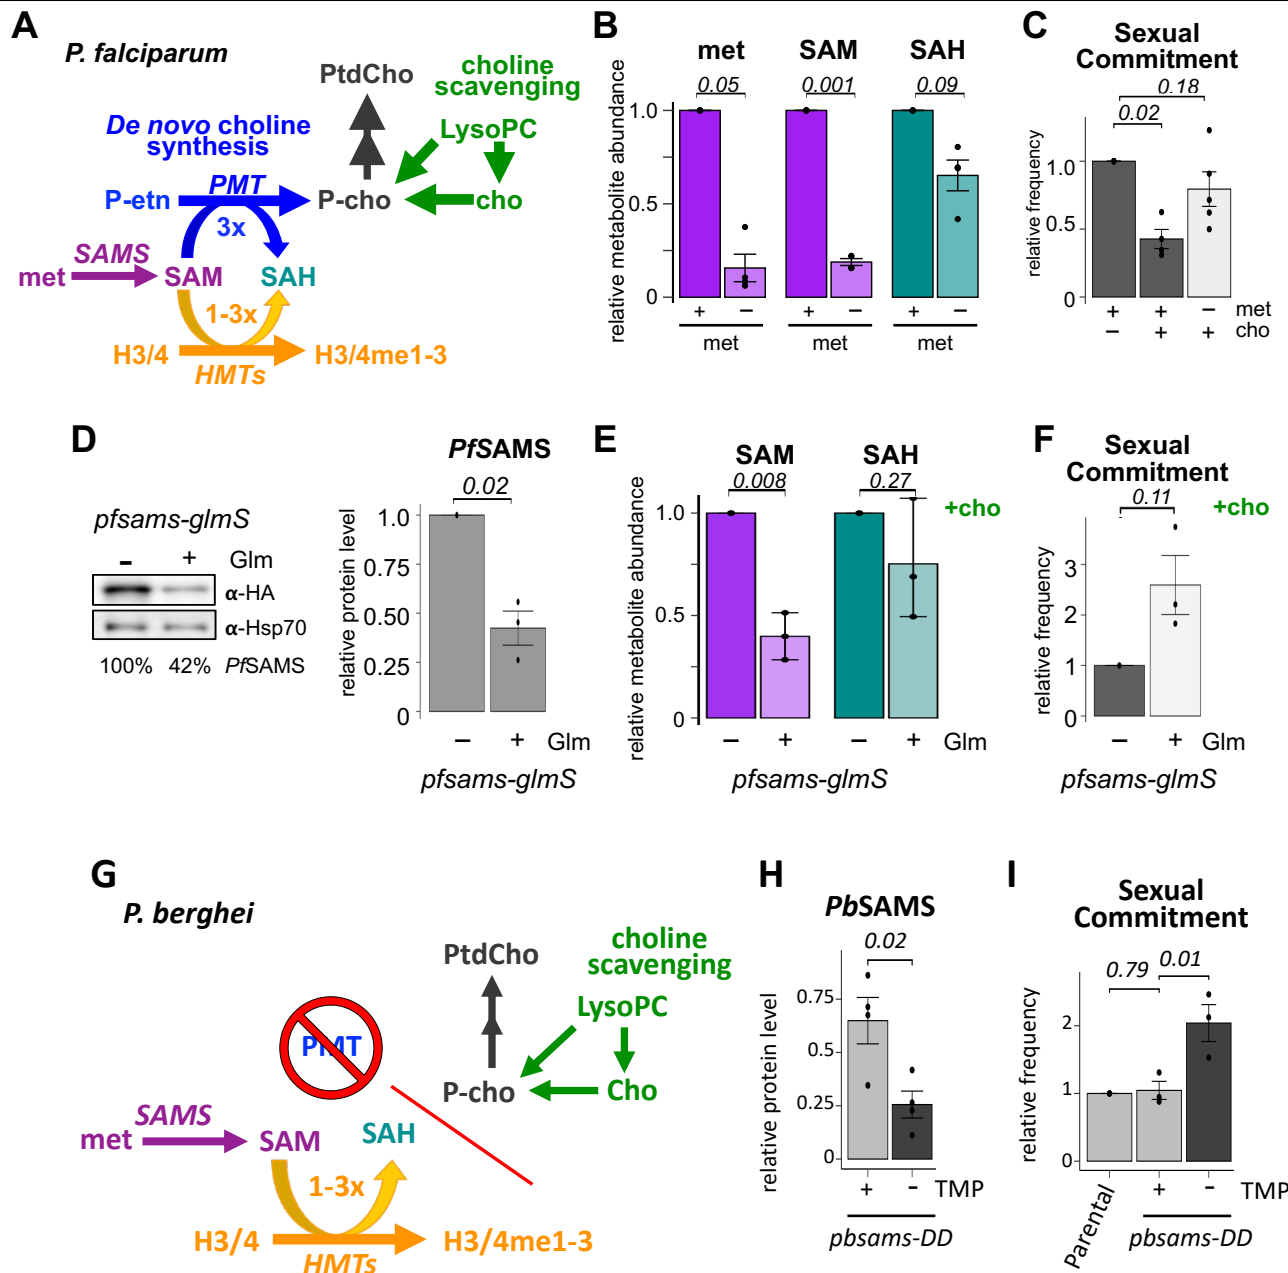

**Figure 3. Intracellular SAM abundance regulates the frequency of sexual differentiation in human and rodent malaria parasites.** (A) SAM and SAH are substrate and product, respectively, of both *de novo* P-cho synthesis and histone methylation. (B) Intracellular levels of methionine, SAM and SAH in growth medium containing standard (100  $\mu$ M) or no methionine (n=3). (C) Removal of extracellular methionine reverses the suppressive effects of choline supplementation on sexual commitment (n=5). (D) Knockdown of *PfSAMS* in *pfsams-HA-glmS* parasites by treatment with 2.5 mM glucosamine (Glm) resulted in a 58% reduction in SAMS protein levels. (E) Knockdown of SAMS reduced intracellular SAM levels by 59% and (F) resulted in a 2.5-fold increase in sexual differentiation even in the presence of choline (n=3). (G) Loss of PMT in rodent malaria parasites, such as *P. berghei*, decouples SAM and SAH from PtdCho synthesis. (H) Removal of the stabilizing ligand TMP from *P. berghei pbsams-DD* knockdown parasites reduced *PbSAMS* by 61% and (I) resulted in a 2-fold increase in sexual differentiation (n=3-4). Bar graphs show mean values relative to the reference condition  $\pm$  s.e.m. Italicized numbers are p-values based on two-sided paired t-tests.

1 Since methionine is critical for a variety of cellular functions including translation, we wanted to test whether  
2 the effect of methionine on commitment levels was specific to changes in SAM availability. To this end we  
3 generated glucosamine-regulatable *pfsams-glmS* knockdown parasites (Extended Data Figure 7). Upon  
4 addition of glucosamine, protein levels of *PfSAMS* were reduced by 58% (Figure 3D), which, even in the  
5 presence of choline, resulted in a two-fold reduction in SAM levels (Figure 3E) along with a more than 2.5-fold  
6 increase in sexual commitment (Figure 3F). Together, these findings demonstrate that sexual commitment is  
7 directly regulated by SAM availability.

### 8 9 **SAM, but not P-cho precursors, regulates sexual commitment in rodent malaria parasites.**

10 Earlier studies found that, unlike in *P. falciparum*, supplementation with P-cho precursors had little to no  
11 effect on sexual commitment in the rodent malaria parasite *Plasmodium berghei*<sup>15</sup>. In the context of our  
12 proposed model, where the consumption of SAM by *PMT* provides the link between P-cho precursors and  
13 histone methylation, this observation is readily explained by the fact that the *PMT* ortholog was lost in the  
14 rodent malaria parasite lineage<sup>27</sup>, thereby decoupling P-cho availability from SAM and SAH abundance in  
15 rodent parasites (Figure 3G). However, since heterochromatin-mediated silencing of the *ap2-g* locus also  
16 controls sexual commitment in rodent parasites<sup>3,5</sup>, we hypothesized that commitment in *P. berghei* would  
17 never-the-less remain sensitive to changes in SAM availability. To test this, we generated SAMS knockdown  
18 parasites in *P. berghei* by creating a C-terminal fusion of the endogenous coding sequence with the ecDHFR-  
19 based destabilization domain (*pbsams-dd-ha*, Extended Data Figure 8A-B). Upon removal of the stabilizing  
20 ligand trimethoprim, *PbSAMS* expression was reduced by 60% in *pbsams-dd-ha* blood-stages (Figure 3H,  
21 Extended Data Figure 8C) and resulted in a two-fold increase in sexual commitment (Figure 3I). This  
22 demonstrates that SAM availability regulates the rate of sexual commitment even when decoupled from  
23 PtdCho metabolism.

### 24 25 **Heterochromatin maintenance at the *pfap2-g* locus is responsive to changes in both SAM and SAH.**

26 In higher eukaryotes, changes in metabolism that alter intracellular SAM and SAH can have major effects on  
27 the methylation states of histone and associated regulation of gene expression<sup>24,28-31</sup>. Methionine depletion  
28 and reduction in SAM abundance led to decreased methylation of specific histone modifications including  
29 H3K4me3, H3K9me3, H3K4me2, and H3K36me3, with H3K4me3 exhibiting the most profound changes,  
30 leading to a change in gene expression<sup>24,28,32</sup>. Since the frequency of sexual commitment in malaria parasites  
31 is determined by the efficiency of heterochromatin-mediated silencing of AP2-G expression and changes in  
32 intracellular SAM directly alter commitment rates (Figure 3), we used CUT&RUN chromatin profiling<sup>33</sup> to



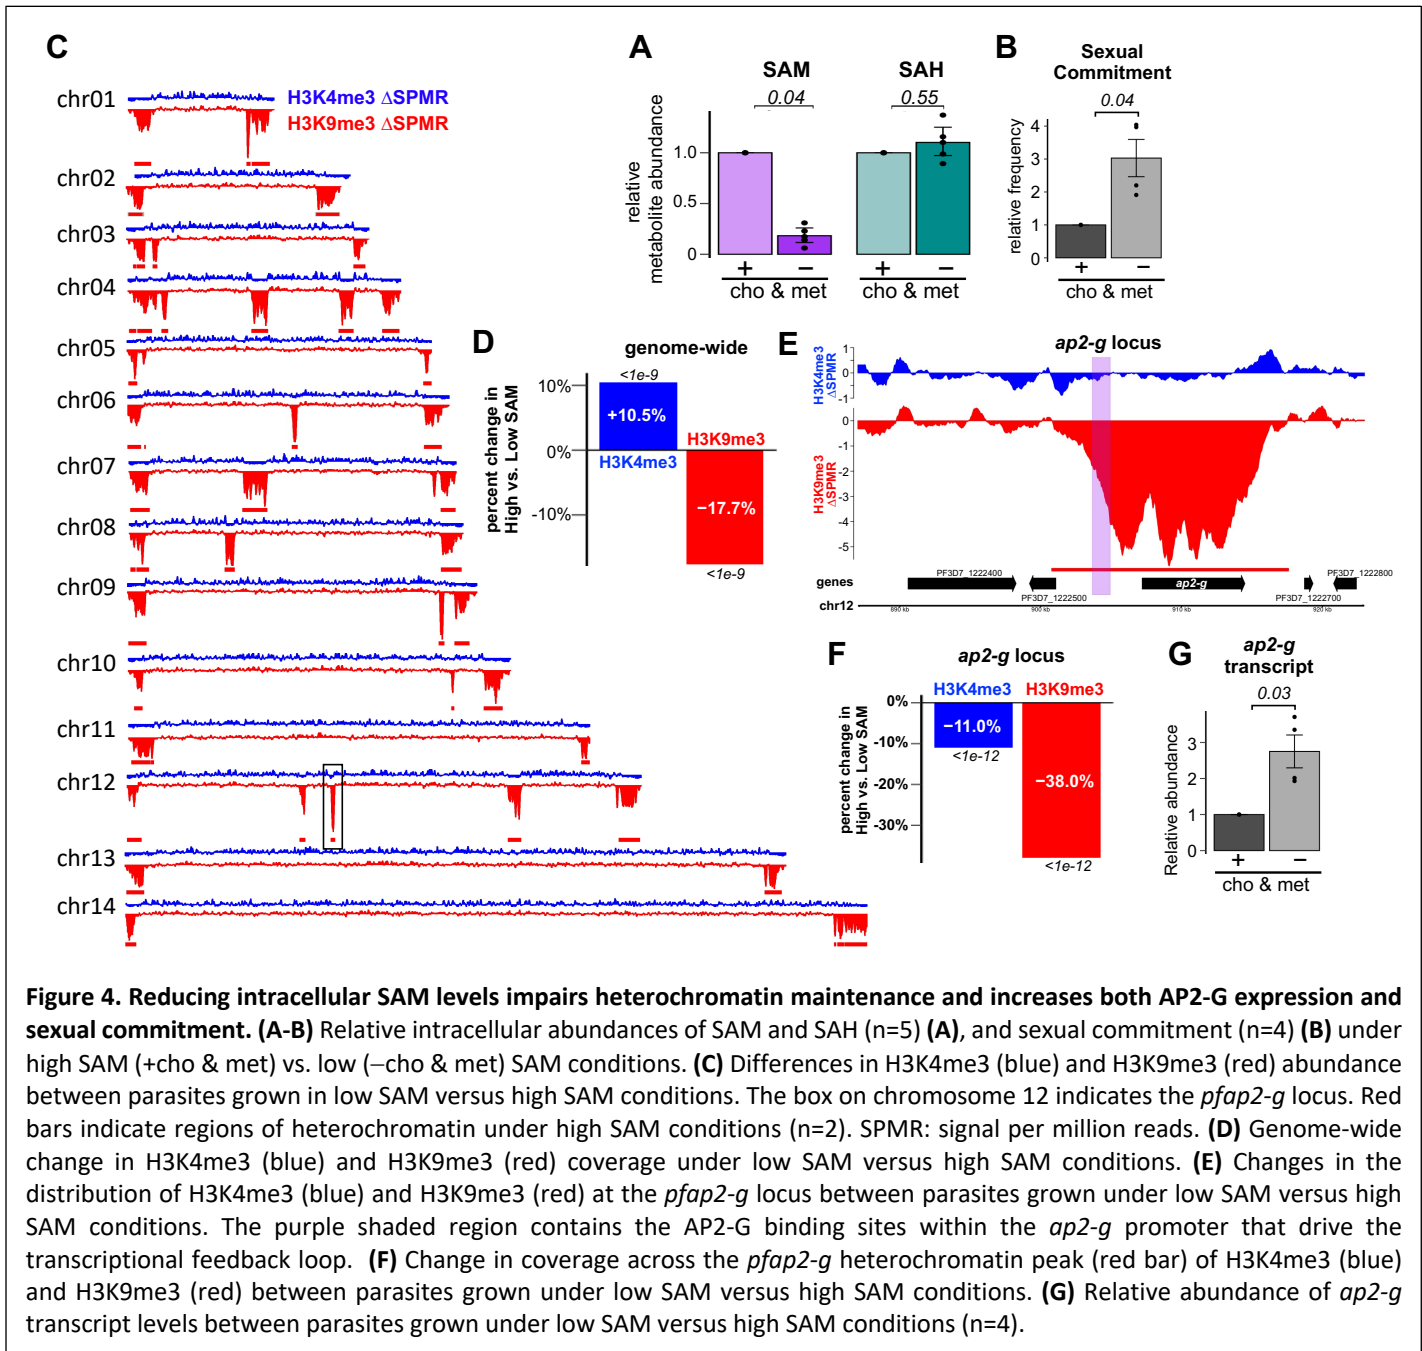

**Figure 4. Reducing intracellular SAM levels impairs heterochromatin maintenance and increases both AP2-G expression and sexual commitment.** (A-B) Relative intracellular abundances of SAM and SAH (n=5) (A), and sexual commitment (n=4) (B) under high SAM (+cho & met) vs. low (–cho & met) SAM conditions. (C) Differences in H3K4me3 (blue) and H3K9me3 (red) abundance between parasites grown in low SAM versus high SAM conditions. The box on chromosome 12 indicates the *pfap2-g* locus. Red bars indicate regions of heterochromatin under high SAM conditions (n=2). SPMR: signal per million reads. (D) Genome-wide change in H3K4me3 (blue) and H3K9me3 (red) coverage under low SAM versus high SAM conditions. (E) Changes in the distribution of H3K4me3 (blue) and H3K9me3 (red) at the *pfap2-g* locus between parasites grown under low SAM versus high SAM conditions. The purple shaded region contains the AP2-G binding sites within the *ap2-g* promoter that drive the transcriptional feedback loop. (F) Change in coverage across the *pfap2-g* heterochromatin peak (red bar) of H3K4me3 (blue) and H3K9me3 (red) between parasites grown under low SAM versus high SAM conditions. (G) Relative abundance of *ap2-g* transcript levels between parasites grown under low SAM versus high SAM conditions (n=4).

1 examine whether these changes could substantially alter the abundance or distribution of the main histone  
 2 methylation marks associated with both gene silencing (H3K9me3) and active transcription (H3K4me3) (Figure  
 3 4)<sup>34,35</sup>. To evaluate the effect of SAM on histone methylation patterns we compared the distribution of these  
 4 marks in the presence of abundant extracellular choline and methionine when SAM levels are high to  
 5 conditions when the absence of these metabolites in the growth medium results in low SAM levels (Figure  
 6 4A), and elevated rates of sexual commitment (Figure 4B).

7 In contrast to H3K4me3, which was somewhat elevated when intracellular SAM was low, we observed  
 8 substantial genome-wide reductions in the abundance of the repressive H3K9me3 mark (Figure 4C-D) under

1 low SAM conditions when compared to high SAM conditions. This reduction in H3K9me3 was observed in both  
2 regions of sub-telomeric heterochromatin domains and non-subtelomeric heterochromatin islands (Figure 4C,  
3 Extended Data Figure 9).

4 Closer examination of the region containing *pfap2-g* on chromosome 12 found that H3K9me3  
5 occupancy across the locus was reduced by 38.0% under low SAM conditions (Figure 4E-F). At the leading edge  
6 of the heterochromatin island, which overlaps the promoter region containing the *PfAP2-G* binding sites that  
7 drive the transcriptional feedback loop, this reduction was even more profound (-42.0% under low SAM,  $p <$   
8  $1e-12$ ). These reductions in the H3K9me3 silencing mark were accompanied by a 2.8-fold increase in transcript  
9 levels of *ap2-g* demonstrating that H3K9me3 occupancy and expression of the locus is responsive to changes  
10 in SAM (Figure 4G).

11 Each transfer of a methyl group from SAM generates one equivalent of SAH, which can act as a potent  
12 feedback inhibitor for many SAM-dependent methyltransferases<sup>36</sup>, though histone methyltransferases differ  
13 in their susceptibility to feedback inhibition by SAH<sup>37</sup>. Since *de novo* P-cho synthesis by *PMT* therefore  
14 represents not only a major sink of SAM but also an equivalently large source of intracellular SAH (Figure 2,  
15 Extended Data Figure 1), we also evaluated if direct changes to the intracellular levels of SAH can alter sexual  
16 commitment. To this end, we treated parasites during a single commitment cycle with 3-deaza-adenosine (3-  
17 DZA), a potent inhibitor of SAH hydrolase (SAHH), the enzyme that converts SAH into adenine and  
18 homocysteine (Figure 5A)<sup>38,39</sup>. We found that treatment with 3-DZA increased commitment levels in a dose  
19 dependent manner while having only a minor effect on parasite growth (Extended Data Figure 10). Treatment  
20 with 100 nM 3-DZA in the presence of abundant methionine and choline greatly increased both SAH and SAM  
21 levels. The latter is likely the result of reduced consumption of SAM by methyltransferases as they are  
22 feedback inhibited by the increasing SAH levels (Figure 5B). SAHH inhibition by 3-DZA more than doubled  
23 sexual commitment, fully reversing the suppressive effects of choline supplementation (Figure 5C). These  
24 results demonstrate that elevating SAH levels is sufficient to increase sexual commitment rates, even when  
25 SAM is abundant. These data are in alignment with a previous study which found that homocysteine, the  
26 metabolic product and feedback inhibitor of SAHH that accumulates in culture and in the serum of infected  
27 patients, induces gametocytogenesis in culture<sup>40</sup>.

28 Since suppression of commitment with choline reduced intracellular SAH levels but left SAM levels  
29 largely unchanged, we wanted to also evaluate whether high SAH was sufficient to impair heterochromatin  
30 maintenance even when SAM is abundantly available. While treatment with 3-DZA reduced genome-wide  
31 H3K4me3 abundance by 8.3%, it had even more profound effects on the H3K9me3 silencing mark, which was  
32 reduced 22.3% genome-wide (Figure 5D-E). This reduction in H3K9me3 was again observed in both regions of

1 sub-telomeric heterochromatin domains and non-subtelomeric heterochromatin islands (Figure 4C, Extended  
 2 Data Figure 11).

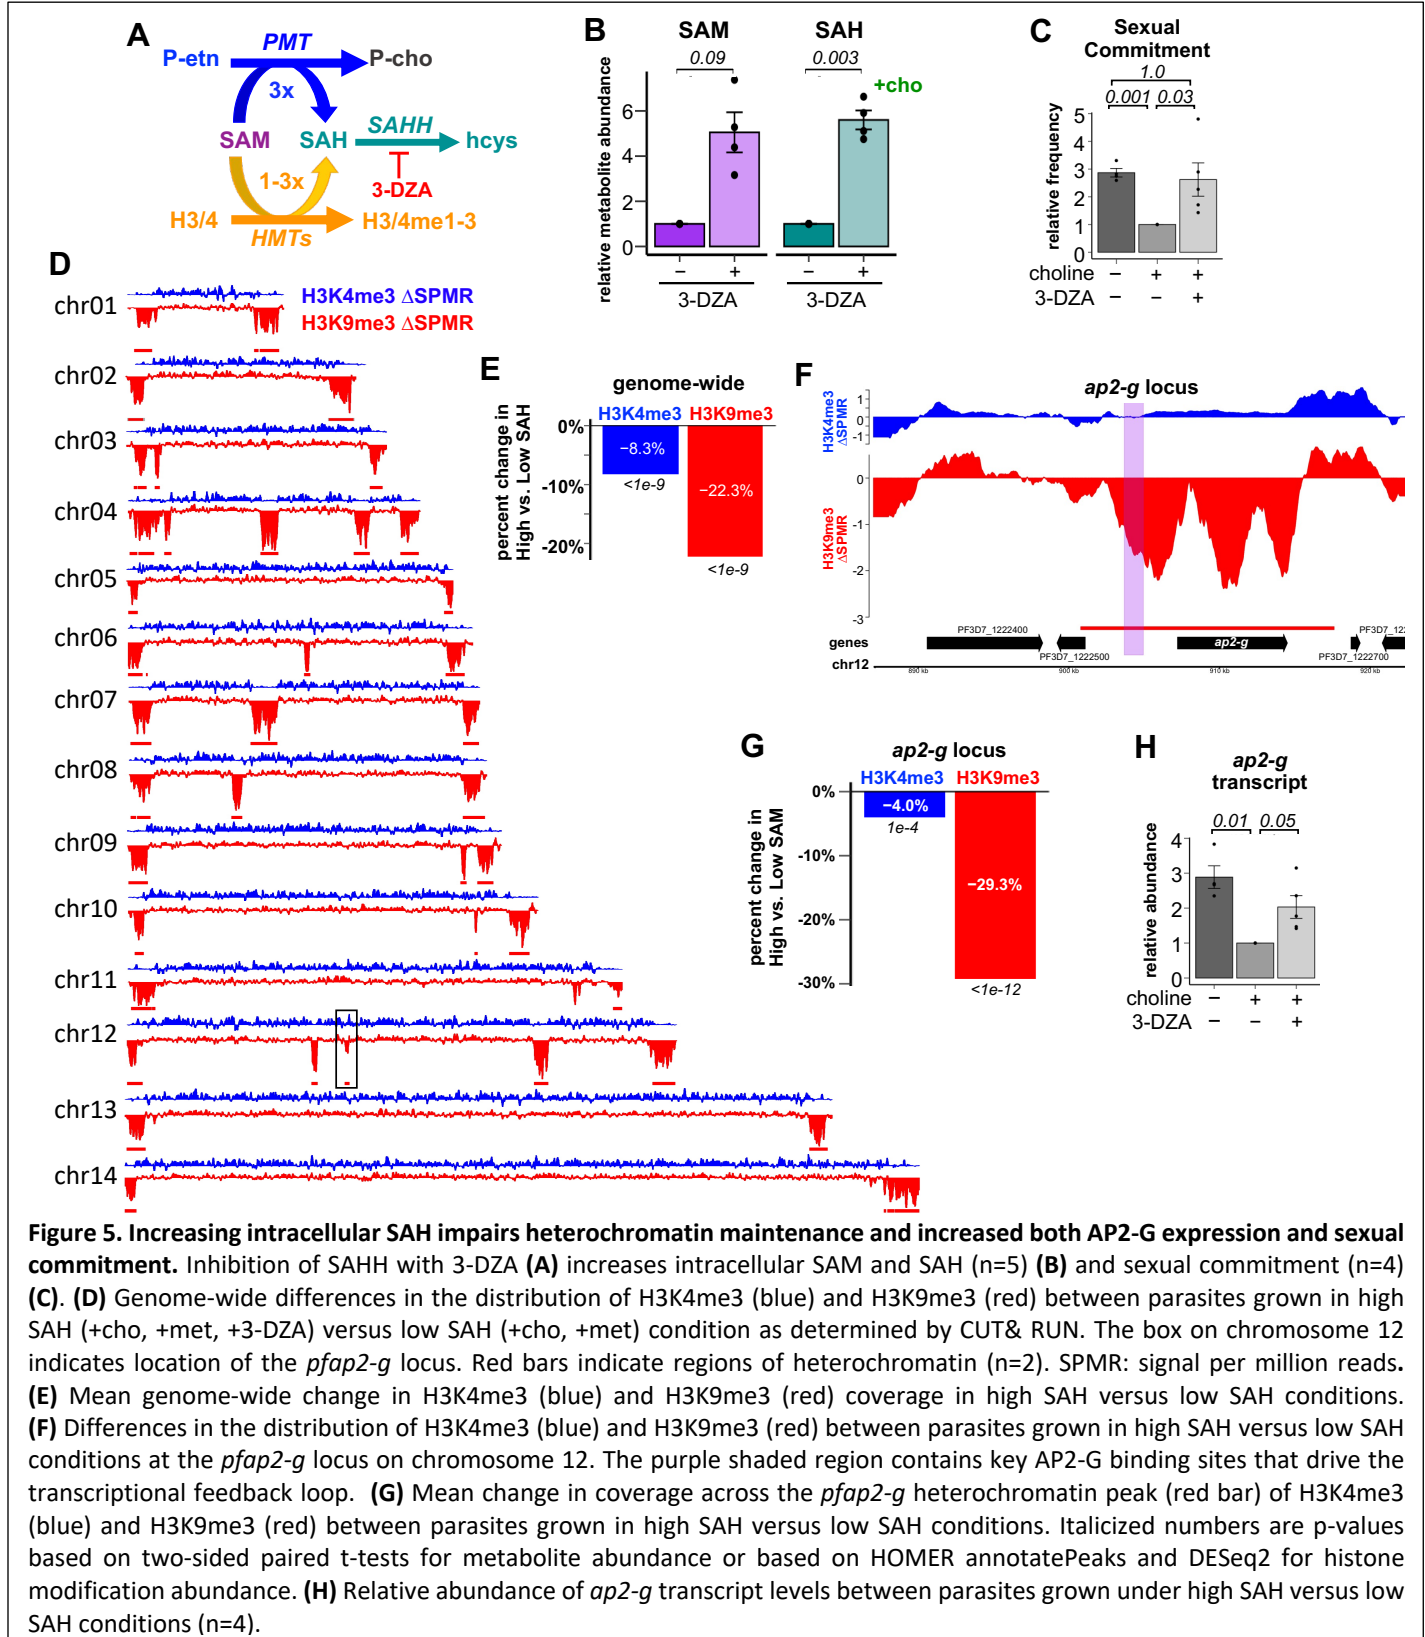

**Figure 5. Increasing intracellular SAH impairs heterochromatin maintenance and increased both AP2-G expression and sexual commitment.** Inhibition of SAHH with 3-DZA (A) increases intracellular SAM and SAH (n=5) (B) and sexual commitment (n=4) (C). (D) Genome-wide differences in the distribution of H3K4me3 (blue) and H3K9me3 (red) between parasites grown in high SAH (+cho, +met, +3-DZA) versus low SAH (+cho, +met) condition as determined by CUT& RUN. The box on chromosome 12 indicates location of the *pfap2-g* locus. Red bars indicate regions of heterochromatin (n=2). SPMR: signal per million reads. (E) Mean genome-wide change in H3K4me3 (blue) and H3K9me3 (red) coverage in high SAH versus low SAH conditions. (F) Differences in the distribution of H3K4me3 (blue) and H3K9me3 (red) between parasites grown in high SAH versus low SAH conditions at the *pfap2-g* locus on chromosome 12. The purple shaded region contains key AP2-G binding sites that drive the transcriptional feedback loop. (G) Mean change in coverage across the *pfap2-g* heterochromatin peak (red bar) of H3K4me3 (blue) and H3K9me3 (red) between parasites grown in high SAH versus low SAH conditions. Italicized numbers are p-values based on two-sided paired t-tests for metabolite abundance or based on HOMER annotatePeaks and DESeq2 for histone modification abundance. (H) Relative abundance of *ap2-g* transcript levels between parasites grown under high SAH versus low SAH conditions (n=4).

3  
 4 H3K9me3 occupancy across the *pfap2-g* locus on chromosome 12 was reduced by 29.3% under high SAH  
 5 conditions (Figure 5F-G) and at the region containing the *PfAP2-G* binding sites that drive the transcriptional

1 feedback loop, this reduction was more profound at -39.2% ( $p < 1e^{-12}$ ) compared to low SAH conditions. These  
2 reductions in the H3K9me3 silencing mark were accompanied by a doubling of *ap2-g* transcript abundance  
3 (Figure 5H) demonstrating that H3K9me3 occupancy and expression of the locus are responsive to changes in  
4 SAH as well as SAM. Even when SAM is abundant, increasing SAH also impairs heterochromatin maintenance  
5 at the *pfap2-g* locus, increasing sexual commitment.

## 7 DISCUSSION

8 Malaria parasites have evolved sophisticated mechanisms to sense and adapt to the diverse physiological  
9 niches they occupy during their life cycle. The switch from asexually replicating blood stage parasites to male  
10 and female gametocytes requires balancing a trade-off between maintaining in-host persistence and  
11 maximizing transmission between hosts. Several metabolites have been implicated in affecting this switch.  
12 Serine and homocysteine both increase frequencies of sexual differentiation<sup>19,40</sup>, while LysoPC and its  
13 metabolic product, choline, both act as potent suppressors of sexual commitment<sup>15</sup>. Additionally, the  
14 concentrations of these precursors are especially low in the bone marrow, the primary site of *P. falciparum*  
15 gametocytogenesis<sup>15,17</sup>. Maturation in the bone marrow protects immature gametocytes from splenic  
16 clearance until they mature into highly deformable stage V gametocytes that are able to pass through the  
17 spleen<sup>41,42</sup>. Intriguingly, increased sexual commitment of parasite infecting immature RBCs has been noted  
18 repeatedly<sup>43-45</sup>. Unlike in mature RBCs, P-cho metabolism is highly active in immature RBCs and essential for  
19 terminal erythropoiesis<sup>46,47</sup>. This would reduce the availability of P-cho precursors to parasites infecting  
20 immature RBCs and make them more reliant on *de novo* PtdCho synthesis via PMT.

21 Here we show that a drop in P-cho precursors leads to a decrease in intracellular SAM and rise in SAH  
22 as the result of increased *de novo* P-cho synthesis by PMT. These changes in SAM and SAH reduce the efficiency  
23 of H3K9me3 maintenance as the parasite replicates its genome 20-30 times during schizogony. This reduction  
24 in heterochromatin is not limited to the heterochromatin island on chromosome 12 that contains the *ap2-g*  
25 locus but occurs genome-wide. However, because AP2-G is the only transcription factor regulated by  
26 heterochromatin and because of its ability to bind the regulatory region of its own promoter, these reductions  
27 in heterochromatin can result in the activation of AP2-G and commit parasites to sexual development (Figure  
28 6). However, because AP2-G is the only transcription factor regulated by heterochromatin and because of its  
29 ability to bind its own promoter, these reductions in heterochromatin can result in the activation of AP2-G  
30 and commit parasites to sexual development (Figure 6).

31 While we cannot exclude the possibility of other, unknown methylation reactions also regulating  
32 sexual commitment, H3K9 methylation has repeatedly been shown to strongly regulate AP2-G and sexual

1 commitment in malaria parasites. Intriguingly, in malaria parasites methylation of H3K9 is more sensitive to  
 2 changes in SAM and SAH than H3K4 methylation, unlike what has been reported for higher eukaryotes. This  
 3 suggests a need for future examination of whether the  $K_m$  for SAM and  $K_i$  and SAH of *Pf*SET3, the parasite's  
 4 only Su(var)3-9 methyltransferase, are in the range of the intracellular concentrations of these two  
 5 metabolites, which would allow their concentrations to directly regulate the deposition of the H3K9me3  
 6 silencing mark.

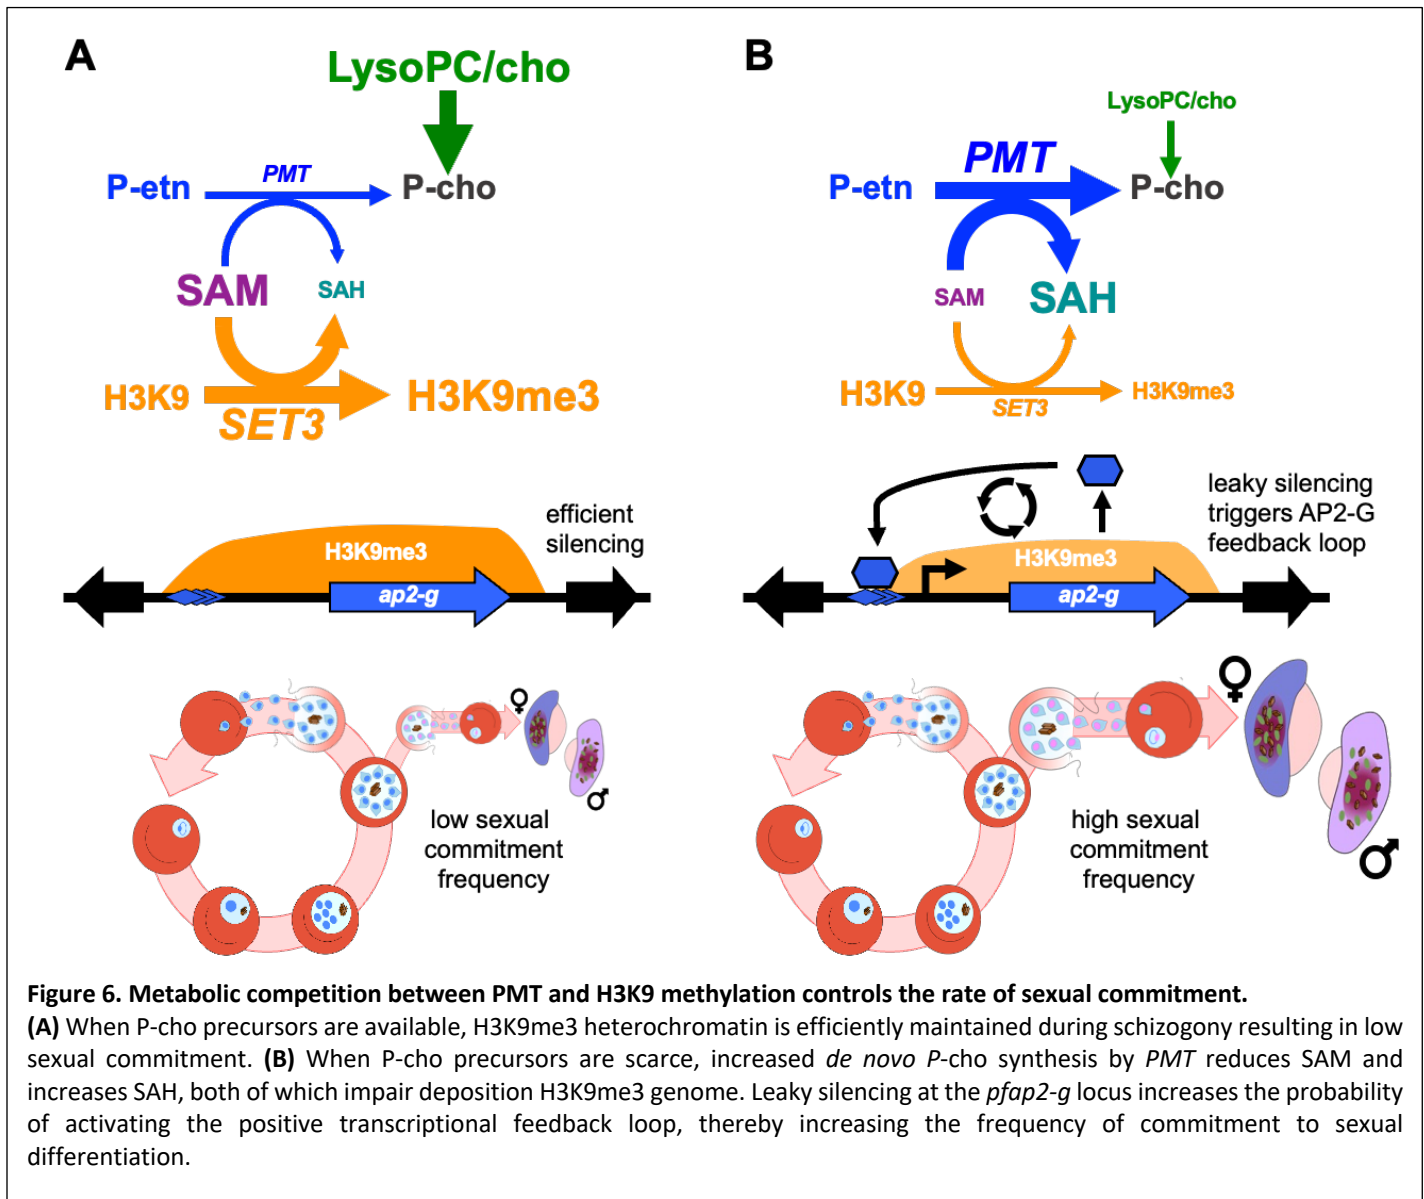

7  
 8 This model also explains the previously described observation that in rodent parasites sexual commitment is  
 9 not responsive to P-cho precursors, as the loss of PMT in rodent malaria parasites decouples PtdCho synthesis  
 10 from SAM, SAH, and histone methylation. Strikingly, this loss of PMT in rodent malaria parasites was  
 11 accompanied by a lineage-specific expansion of the *fam-a* gene family from a single copy in the primate  
 12 lineage to 42-215 copies<sup>48</sup>. Members of this family contain the steroidogenic acute regulatory-related lipid

1 transfer (START) domain and have been shown to transport PtdCho<sup>49</sup>. Without the ability to generate this key  
2 phospholipid *de novo*, this expansion presumably allows rodent malaria parasites to scavenge a full  
3 complement of PtdCho precursors.

4 In summary, changing availability of host LysoPC results in a shift in intracellular SAM/SAH which leads  
5 to changes in histone methylation, in particular the H3K9me3 silencing mark. Inefficient silencing at the *pfap2-*  
6 *g* locus increases the frequency of activation of the transcriptional feedback loop that commits parasites to  
7 sexual differentiation in *P. falciparum*. This allows parasites to increase sexual differentiation in the bone  
8 marrow where LysoPC is low and where gametocytes can develop without the risk of splenic clearance.

## 9 10 **ACKNOWLEDGMENTS**

11 **General:** We wish to thank Dr. Jeffrey Dvorin (Boston Childrens Hospital) for providing Compound 1, the  
12 Weill Cornell Medicine genomics core for technical support, and the Eukaryotic Pathogen, Vector and Host  
13 Informatics Resource (VEuPathDB) for providing essential bioinformatics resources.

14  
15 **Funding:** This work was supported by funds from Weill Cornell Medicine (BK), NIH 1R01 AI141965 (BK), NIH  
16 1R01 AI138499 (KWD), NIH 5F31AI136405-03 (CH), NIH R25 AI140472 (KYR), the Fundação para a Ciência e  
17 Tecnologia (MMM, DRIVER-LISBOA-01-0145-FEDER-030751) and “laCaixa” Foundation (MMM, under the  
18 agreement HR17/52150010).

19  
20 **Author contributions:** Conceptualization: BFCK, KWD, MMM; Methodology: BFCK, CTH, MMM;  
21 Investigation: CTH, XT, RCM, LNV, IMM; Software, Formal Analysis, Data Curation: BFCK, CTH, XT; Writing –  
22 Original Draft: CTH Writing – Review & Editing: BFCK, CTH, MMM; Visualization: BFCK, CTH; Supervision:  
23 BFCK, KYR, MMM; Project Administration: B.F.C.K; Funding Acquisition: BFCK, KWD, MMM.

24  
25 **Competing interests:** The authors declare no competing interests.

## 26 27 **Data and materials availability:**

28 All data needed to evaluate the conclusions in the paper are present in the paper or the supplementary  
29 materials. Raw and processed CUT & RUN data can be obtained from the NCBI Gene Expression Omnibus  
30 (GSE197916). The CUT & RUN analysis pipeline is available at  
31 <https://github.com/KafsackLab/MetChoH3K9me3>.

## 1 MATERIALS AND METHODS

### 2 *P. falciparum* cell culture

3 The parasite strains used for this study were NF54 obtained from BEI Resources and the *Pf-peg4*-tdTomato<sup>50</sup>.  
4 Cultures were maintained using established culturing techniques<sup>51</sup>. Standard complete media was RPMI-1640  
5 supplemented with 25 mM HEPES, 368  $\mu$ M hypoxanthine, 1 mM sodium hydroxide, 24 mM sodium  
6 bicarbonate, 21  $\mu$ M gentamycin (Millipore Sigma), with Albumax II Lipid-Rich BSA (Gibco), unless otherwise  
7 stated. Concentrations for choline and LysoPC supplementation were used according to<sup>15</sup>. See Extended Data  
8 Table 1 for changes to media compositions used throughout this manuscript. RBCs or cultures were washed  
9 three times with respective experimental media conditions at the start of each change in media condition.

### 11 Generation of *PfSAMS-glmS* and *PMT-glmS* conditional knockdown lines

12 The 3' portion of the coding sequence for *pfsams* (577-1206bp) and *PMT* (651-1217bp) was amplified from  
13 gDNA and cloned by Gibson assembly into the pSLI-HAX3-glmS plasmid (gift from Professor R. Dzikowski)<sup>25</sup>  
14 following *NotI* and *XmaI* double digest. Following transfection of NF54 parasites, cultures were selected for  
15 the presence of the plasmid with 4nM WR99210 (gift of Jacobus Pharmaceuticals), follow by selection for  
16 integrants with G418 (Millipore Sigma). Single-crossover integration of the plasmid was confirmed via PCR  
17 (Extended Data Figures 5-6, Extended Data Table 2), and parasites were cloned to isolate a population with  
18 single cross-over lacking any remaining WT loci. Integrated parasite lines were maintained under G418 drug  
19 pressure.

### 21 Animal Maintenance

22 Animal research was conducted at the Instituto de Medicina Molecular (Lisboa, Portugal). All protocols were  
23 approved by the animal ethics committee (ORBEA committee) at the institute and performed according to  
24 national and European regulations. BALB/c mice (age 5-8 weeks; males) were purchased from Charles River  
25 Laboratories (Saint-Germain-sur-l'Arbresle, France), kept in specific-pathogen-free conditions, and subjected  
26 to regular pathogen monitoring by sentinel screening. Experimental animals were randomly assigned and  
27 allowed free access to water and food.

### 29 Generation of *PbSAMS-DD* conditional knockdown parasites

30 Wild-type *P. berghei* ANKA strain was obtained from the MR4 repository (Manassas, Virginia). *P. berghei*  
31 *pbsams-DD* parasite line was obtained by double crossover homologous recombination. To do so, parasites  
32 were transfected by electroporation of purified schizonts, harvested on day 7-10 post transfection and

1 genotyped by PCR. Transgenic parasites were then dilution cloned and further stored at -80 °C in frozen blood  
2 vials, containing  $10^7$  blood stage parasites.

3 Recombinant parasites carrying the human dihydrofolate reductase (*hdhfr*) gene cassette were  
4 positively selected by treatment of mice with pyrimethamine and trimethoprim to stabilize *PbSAMS*.  
5 Confirmation of transgenic parasite genotype, construct integration at the desired genomic loci and  
6 elimination of WT locus were assessed by PCR. Blood from the tail vein of infected mice was collected in 200 $\mu$ L  
7 of 1x PBS and genomic DNA was isolated using the NZY Blood gDNA Isolation Kit (NZYTech), according to  
8 manufacturer's guidelines (Extended Data Figure 7, Extended Data Table 2). Stabilization of *PbSAMS*-DD fusion  
9 protein throughout infection was achieved in vivo, by administration of trimethoprim (TMP) to mice (0.25  
10 mg/ml of TMP in drinking water), 2 days prior to infection.

### 11 12 **Quantification of *PbSAMS* knockdown**

13 All steps of parasite pellet extraction protocol were performed at 4°C to minimize protein degradation and all  
14 centrifugations were executed at 1000 x g for 10 min. Mice were sacrificed at day 4 post infection, 1mL of  
15 blood was collected by cardiac puncture, washed in 10mL of 1x PBS and centrifuged. Packed erythrocytes were  
16 saponin-lysed in 0.15% saponin and centrifuged. Parasite pellet was washed twice in PBS containing 1x  
17 Proteinase inhibitor cocktail (Roche cOmplete Protease inhibitor tablets, EDTA free). Parasite pellet was then  
18 resuspended in lysis buffer (4 % SDS; 0.5 % Triton X-114 in 1x PBS), incubated on ice for 10 min, centrifuged at  
19 21000 x g for 10 min and the supernatant was collected. Total protein content was determined using the Bio-  
20 Rad protein assay kit according to manufacturer's instructions. Protein samples diluted in 5x SDS sample buffer  
21 (NZYTech) were denatured at 95°C for 10 min and resolved in an 8% polyacrylamide gel (SDS-PAGE). Proteins  
22 were blotted into a nitrocellulose membrane by wet transfer at 200mA for 2 hours. Primary antibodies, mouse  
23 anti-HA antibody (1:1000, from Covance) and rabbit anti-Bip (1:2000, GeneScript) were incubated overnight  
24 at 4°C. Secondary antibodies, anti-mouse horseradish peroxidase (HRP)-conjugated and anti-rabbit HRP  
25 (1:10000, Jackson ImmunoResearch Laboratories) were incubated at RT for 1 hour. Signal detection was  
26 obtained using Luminata Crescendo Western HRP substrate (Merck Milipore®) and the ChemiDoc XRS+ Gel  
27 Imaging System (BioRad). Protein band quantification was performed on Image Lab software (version 5.0)  
28 using BIP levels for normalization.

### 29 30 **Quantification of gametocytes in *PbSAMS*-DD-HA parasites**

31 Mice infections were performed by intraperitoneal inoculation of  $1 \times 10^6$  infected red blood cells (iRBCs)  
32 obtained by passage in the correspondent BALB/c background mice. Parasitemia (% of iRBCs) was monitored



1 daily and gametocytemia (% of mature gametocytes) was determined on day 3 after infection, by microscopic  
2 analysis of Giemsa-stained blood smears. A total of 5-10 thousand RBCs were analysed in randomly acquired  
3 images and semi-automatically quantified using Image J software (<http://rsbweb.nih.gov/ij>).

#### 4 5 **Induction and quantification of *P. falciparum* sexual commitment**

6 Synchronous gametocyte induction was performed as previously described <sup>10</sup>. Briefly, parasites were double-  
7 synchronized with 5% sorbitol to achieve a synchrony of  $\pm$  6h in the previous cycle. Synchronized ring-stage  
8 parasites were set up at 1.5% parasitemia (1% hematocrit) in 96-well, flat bottom plates under specific  
9 nutrient conditions to induce sexual commitment. Following reinvasion, on the first day of gametocyte  
10 development (D+1), ring-stage parasitemia was determined using flow cytometry and 50mM *N*-acetyl-D-  
11 glucosamine was added for 5 consecutive days. Gametocytes were then counted on day 6 (D+6) and  
12 commitment rate was determined by dividing the D+6 gametocytemia by the D+1 parasitemia assessed prior  
13 to *N*-acetyl-D-glucosamine addition. Gametocytes induced using the *Pf-peg4*-tdTomato fluorescent  
14 gametocyte reporter line were counted using flow cytometry <sup>50</sup>.

#### 15 16 **RNA Extraction, cDNA synthesis, and quantitative RT-PCR**

17 Total RNA from saponin-lysed parasites was extracted using Trizol (Invitrogen) or Direct-Zol RNA MiniPrep Plus  
18 kit (Zymo Research). 500ng total RNA was pre-treated with 2U amplification grade DNase I (Invitrogen) and  
19 reverse transcribed using SuperScript III Reverse Transcriptase kit (Invitrogen) and random hexamers  
20 (Invitrogen). Quantitative PCR was performed on the Quant Studio 6 Flex (Thermo Fisher) using iTaq Sybr  
21 Green (Bio-Rad) with specific primers for selected target genes (Extended Data Table 2) and normalized to  
22 seryl-tRNA synthetase or ubiquitin-conjugating enzyme transcript abundance. To quantify AP2-G transcript  
23 levels at the very end of the commitment cycle, 2.5  $\mu$ M Compound 1 (a generous gift of Dr. Jeffrey Dvorin)  
24 was added at 36 hpi to prevent egress and RNA was extracted 12 hours later.

#### 25 26 **Metabolite Analysis**

27 Synchronous *P. falciparum* parasites were grown from 8hpi to 34hpi  $\pm$  6 hpi (100mL, 3% hematocrit, 5-6%  
28 parasitemia) under the indicated growth conditions. Infected red blood cells (iRBC) were then purified to >  
29 90% purity using a 70/40% percoll/sorbitol density gradient and centrifugation (4700 x g for 15 minutes at  
30 room temperature), then washed three times with minimal RPMI. Following isolation, equal numbers of  
31 isolated iRBC, as determined by the Beckman Coulter Z1 Coulter Particle Counter, were then re-incubated in  
32 their respective treatment conditions for four to six more hours to allow parasites to recover from

1 percoll/sorbitol isolation. To ensure, that metabolites were extracted at similar points in the cell cycle, nuclear  
2 replication was followed by flow cytometry after staining with Hoechst 33342 (16  $\mu$ M for 20 min) with a target  
3 nuclear content of 6-8N relative to a ring stage standard. Following recovery, the purity of iRBCs was assessed  
4 using flow cytometry, cells were then pelleted, washed once with 1 mL of 1x PBS, and quickly lysed with 500  
5  $\mu$ L of 90% ultrapure HPLC Grade methanol (VWR), followed by exactly 10 seconds of vortexing before being  
6 stored in dry ice. Lysed samples were then centrifuged at top speed at 4°C and supernatant collected for  
7 metabolite analysis. Uninfected red blood cells (uRBC) were incubated under the same treatment conditions  
8 as iRBC, counted, and methanol extracted to distinguish iRBC metabolite signal from uRBC signal. Extracted  
9 metabolites were stored at -80°C. LC-MS based metabolomic analysis was performed as previously described  
10<sup>52</sup>. 10  $\mu$ L of extract was separated on an Agilent 1290 Infinity LC system containing a Cogent Diamond Hydride  
11 Type C silica column (150 mm  $\times$  2.1 mm; Microsolv Technologies). Acquisition was performed on an Agilent  
12 6230 TOF mass spectrometer (Agilent Technologies, Santa Clara, CA) employing an Agilent Jet Stream  
13 electrospray ionization source (Agilent Technologies, Santa Clara, CA) operated in high resolution, positive  
14 mode. Metabolite identification was verified by exact mass (to 35 ppm) and co-elution with authentic  
15 standards purchased from Millipore Sigma. Batch feature extraction and chromatographic alignment across  
16 multiple data files was performed using the Agilent MassHunter Profinder software and extracted metabolite  
17 data was exported for further statistical analysis using R. Metabolites were quantified based on normalized  
18 peak area (peak area/(number of parasites extracted\*dilution factor)).

19 We took extensive efforts to ensure that metabolite measurements were comparable. First, the nuclear  
20 content of all cultures was monitored closely by volumetric flow cytometry to ensure that cultures were at  
21 similar points in the cell cycle prior to extraction and to provide highly accurate measurement of the number  
22 of parasites extracted. Second, metabolite extraction was always carried out in small batched and samples to  
23 be compares were always extracted in parallel. Third, metabolite peak areas were normalized by the total of  
24 parasites extracted, dilution factor, and injection volume. Fourth, only samples included on the same LC-MS  
25 run were compared. Lastly, a shared reference sample with metabolite spike-ins was also included on each  
26 LC-MS run to facilitate comparison and account for differences in retention time.

## 27 28 **Western Blotting**

29 *PMT*-glmS and *PfSAMS*-glmS knockdown western blots were performed using whole cell lysate. Ring-stage  
30 parasites (12hpi  $\pm$  6 hpi) were treated with or without 2.5mM glucosamine (VWR) to induce protein  
31 knockdown. Parasites were saponin lysed at 36hpi  $\pm$  6 hpi and whole cell extract collected in SDS sample  
32 buffer, then boiled for 10 minutes. Proteins were then separated on 12% SDS PAGE and transferred to a PVDF

1 membrane (Millipore Sigma, 0.2  $\mu$ M). Membranes blocked with 5% milk were then probed with anti-HA  
2 (1:2000, Abcam, ab91110), and anti-hsp70 (1:2000, StressMarq SPtdCho-186) primary antibody solutions,  
3 followed by anti-rabbit IgG (1:5000, Millipore Sigma 12-348) secondary. Chemiluminescence was measured  
4 using the Azure c-Series imaging systems (Azure Biosystems) and quantified using the Fiji open-source image  
5 processing package based on ImageJ.

### 6 7 **Quantification of changes in H3K9me3 and H3K4me3 abundance and distribution.**

8 H3K9me3 and H3K4me3 abundances were measured by Cleavage Under Targets & Release Using Nuclease  
9 (CUT & RUN)<sup>53</sup> adapted for *P. falciparum*<sup>33</sup>. Approximately  $1 \times 10^7$  percoll/sorbitol isolated schizonts (34-38  
10 hpi) per sample were washed three times with 1 ml wash buffer (20 mM HEPES at pH 7.5, 150 mM NaCl, 0.5  
11 mM Spermidine, and  $1 \times$  Roche complete protease inhibitor) at room temperature and resuspended in 225ul  
12 of wash buffer. 25ul of Concanavalin A-coated beads were washed and resuspended in binding buffer (20 mM  
13 HEPES–KOH at pH 7.5, 10 mM KCl, 1 mM CaCl<sub>2</sub>, 1 mM MnCl<sub>2</sub>) before being added to each sample. Samples  
14 were then rotated for 10 minutes at room temperature. Then, samples were placed on a magnetic stand to  
15 clear (30s to 2 minutes) and remove all the liquid. Samples were washed 3x's with DIG wash buffer (wash  
16 buffer with 0.025% digitonin). For each sample, 150 $\mu$ l of antibody wash buffer was added (wash buffer,  
17 0.025% digitonin, and 2 mM EDTA at pH 8.0) with H3K4me3 (0.005 $\mu$ g/ $\mu$ l, C15410003-50, Diagenode),  
18 H3K9me3 (0.005 $\mu$ g/ $\mu$ l, ab8898, abcam), or IgG isotype control (0.005 $\mu$ g/ $\mu$ l, 02-6102, ThermoFisher) was  
19 added to the sample tube and incubated at 4 °C, rotating, overnight. Following antibody incubation, samples  
20 were placed on a magnetic stand to clear and pull off the liquid, then washed 3 x's with DIG wash buffer, 150  
21  $\mu$ l of ProteinA/G-MNASE fusion protein (dilution 1:60, 15-1016, EpiCypher) in DIG wash buffer and rotated at  
22 4 °C for 1 hour. After washing samples 3x's with DIG wash buffer, samples were then washed 3x's with Low  
23 Salt Rinse Buffer (20 mM HEPES–NaOH at pH 7.5, 0.025% digitonin, 0.5 mM spermidine). 200  $\mu$ l of ice-cold  
24 incubation buffer (3.5 mM HEPES–NaOH at pH 7.5, 100mM CaCl<sub>2</sub>, 0.025% DIG) was added and samples were  
25 equilibrated at 0 °C for 30 minutes to achieve targeted digestion. Digestion was then stopped by adding 200  
26  $\mu$ l of stop buffer (170 mM NaCl, 20 mM EGTA at pH 8.0, 20 mM EGTA, 0.0.25% digitonin, 25  $\mu$ g/mL glycogen,  
27 50  $\mu$ g/mL RNase A). After incubation at 37 °C for 30 minutes to release soluble fragments, samples were  
28 digested by adding 2.5  $\mu$ L proteinase K (20 mg/ml) and 2  $\mu$ L 10% SDS, and then incubated at 50 °C for 1 hour.  
29 DNA fragments were purified with phenol–chloroform–isoamyl alcohol and washed by ethanol precipitation,  
30 and finally dissolved in 30  $\mu$ L TE buffer (1mM Tris-HCl pH 8, 0.1 mM EDTA).

31 Library construction was carried out using NEBNext Ultra II DNA Library Prep Kit for Illumina (E7645S,  
32 NEB). 4ng of fragmented DNA was used for end-repair/A-tailing, ligation, and post ligation cleanup with 1.7x

1 volumes of AMPure XP beads (Catalog number, company). Following cleanup, PCR amplification was  
2 performed using 2x KAPA HotStart ready mix (Catalog number, company) and NETFLEX primer mix (Catalog  
3 number, Bio Scientific) with PCR program: 1 min @ 98° C/15 cycles: 10 sec @ 98° C/1 min @ 65° C// 5min @  
4 65° C// hold 4° C. PCR products were size selected with 0.8x volumes, then 1.2x volumes of AMPure XP beads.  
5 Beads were then washed twice with 80% ethanol and DNA eluted with 0.1x TE and used for sequencing in a  
6 Nextseq2000 system as paired-end reads, following quality control.

7 After sequencing, raw reads were trimmed using Trimmomatic v0.38<sup>54</sup> to remove residual adapter  
8 sequences and low quality leading and trailing bases. Both paired and unpaired reads were retained for read  
9 lengths that were at least 30 bases after trimming. Trimmed paired reads were aligned to the PlasmoDB  
10 version 46 *P. falciparum* 3D7 reference genome<sup>26</sup> using BWA v.0.7.1<sup>55</sup>. SAMtools v.1.10<sup>56</sup> was used to  
11 remove low quality alignments as well as sort and index sample files. Normalized fold enrichment tracks were  
12 generated by using the MACS2 v.2.2.7.1<sup>57</sup> callpeak function with settings: -f BAMPE -B -g 2.3e7 -q 0.05 –  
13 nomodel –broad –keep-dup auto –max gap 500. Bedgraph outputs were then passed into the bdgcmp function  
14 with the setting -m FE (fold enrichment) to generate signal tracks to profile histone modification enrichment  
15 levels compared to whole genome. Peak sets from replicates were compared with Bedtools intersect v2.26.0  
16<sup>58</sup>, and peaks that overlapped by at least 1 bp were considered shared. Fold enrichment bedgraphs and peak  
17 sets were then output to RStudio Server (v1.4.1717) for further analysis using the GenomicRanges Package  
18 v.1.44.0<sup>59</sup> and visualized with the GViz v1.38.1 package<sup>60</sup> within the Bioconductor project (release 3.13)<sup>61</sup>.  
19 The full analysis pipeline can be found at <https://github.com/KafsackLab/MetChoH3K9me3>.

20

## REFERENCES

1. Drakeley, C., Sutherland, C., Bousema, J. T., Sauerwein, R. W. & Targett, G. A. T. The epidemiology of *Plasmodium falciparum* gametocytes: weapons of mass dispersion. *Trends in Parasitology* 22, 424–430 (2006).
2. Kafack, B. F. C., Rovira-Graells, N., Clark, T. G., Bancells, C., Crowley, V. M., Campino, S. G., Williams, A. E., Drought, L. G., Kwiatkowski, D. P., Baker, D. A., Cortés, A. & Llinás, M. A transcriptional switch underlies commitment to sexual development in malaria parasites. *Nature* 507, 248–252 (2014).
3. Sinha, A., Hughes, K. R., Modrzynska, K. K., Otto, T. D., Pfander, C., Dickens, N. J., Religa, A. A., Bushell, E., Graham, A. L., Cameron, R., Kafack, B. F. C., Williams, A. E., Llinás, M., Berriman, M., Billker, O. & Waters, A. P. A cascade of DNA-binding proteins for sexual commitment and development in *Plasmodium*. *Nature* 507, 253–257 (2014).
4. Brancucci, N. M. B., Bertschi, N. L., Zhu, L., Niederwieser, I., Chin, W. H., Wampfler, R., Freymond, C., Rottmann, M., Felger, I., Bozdech, Z. & Voss, T. S. Heterochromatin protein 1 secures survival and transmission of malaria parasites. *Cell Host Microbe* 16, 165–176 (2014).
5. Fraschka, S. A., Filarsky, M., Hoo, R., Niederwieser, I., Yam, X. Y., Brancucci, N. M. B., Moring, F., Mushunje, A. T., Huang, X., Christensen, P. R., Nosten, F., Bozdech, Z., Russell, B., Moon, R. W., Marti, M., Preiser, P. R., Bartfai, R. & Voss, T. S. Comparative Heterochromatin Profiling Reveals Conserved and Unique Epigenome Signatures Linked to Adaptation and Development of Malaria Parasites. *Cell Host Microbe* 23, 407–420.e8 (2018).
6. Lopez-Rubio, J. J., Mancio-Silva, L. & Scherf, A. Genome-wide analysis of heterochromatin associates clonally variant gene regulation with perinuclear repressive centers in malaria parasites. *Cell Host Microbe* 5, 179–190 (2009).
7. Coleman, B. I., Skillman, K. M., Jiang, R. H. Y., Childs, L. M., Altenhofen, L. M., Ganter, M., Leung, Y., Goldowitz, I., Kafack, B. F. C., Marti, M., Llinás, M., Buckee, C. O. & Duraisingh, M. T. A *Plasmodium falciparum* Histone Deacetylase Regulates Antigenic Variation and Gametocyte Conversion. *Cell Host Microbe* 16, 177–186 (2014).
8. Brancucci, N. M. B., Witmer, K., Schmid, C. & Voss, T. S. A var gene upstream element controls protein synthesis at the level of translation initiation in *Plasmodium falciparum*. *PLoS ONE* 9, e100183 (2014).
9. Filarsky, M., Fraschka, S. A., Niederwieser, I., Brancucci, N. M. B., Carrington, E., Carrió, E., Moes, S., Jenoe, P., Bartfai, R. & Voss, T. S. GDV1 induces sexual commitment of malaria parasites by antagonizing HP1-dependent gene silencing. *Science* 359, 1259–1263 (2018).
10. Poran, A., Nötzel, C., Aly, O., Mencia-Trinchant, N., Harris, C. T., Guzman, M. L., Hassane, D. C., Elemento, O. & Kafack, B. F. C. Single-cell RNA sequencing reveals a signature of sexual commitment in malaria parasites. *Nature* 551, 95–99 (2017).
11. Josling, G. A., Russell, T. J., Venezia, J., Orchard, L., van Biljon, R., Painter, H. J. & Llinás, M. Dissecting the role of PfAP2-G in malaria gametocytogenesis. *Nature Communications* 11, 1–13 (2020).
12. Llorà-Batlle, O., Michel-Todó, L., Witmer, K., Toda, H., Fernandez-Becerra, C., Baum, J. & Cortés, A. Conditional expression of PfAP2-G for controlled massive sexual conversion in *Plasmodium falciparum*. *Science advances* 6, eaaz5057 (2020).
13. Kent, R. S., Modrzynska, K. K., Cameron, R., Philip, N., Billker, O. & Waters, A. P. Inducible developmental reprogramming redefines commitment to sexual development in the malaria parasite *Plasmodium berghei*. *Nat. Microbiol* 3, 1206–1213 (2018).
14. Neveu, G., Beri, D. & Kafack, B. F. Metabolic regulation of sexual commitment in *Plasmodium falciparum*. *Curr Opin Microbiol* 58, 93–98 (2020).
15. Brancucci, N. M. B., Gerdt, J. P., Wang, C., De Niz, M., Philip, N., Adapa, S. R., Zhang, M., Hitz, E., Niederwieser, I., Boltryk, S. D., Laffitte, M.-C., Clark, M. A., Grüning, C., Ravel, D., Soares, A. B., Demas, A., Bopp, S., Rubio-Ruiz, B., Conejo-García, A., Wirth, D. F., Gendaszewska-Darmach, E., Duraisingh, M. T., Adams, J. H., Voss, T. S., Waters, A. P., Jiang, R. H. Y., Clardy, J. & Marti, M. Lysophosphatidylcholine Regulates Sexual Stage Differentiation in the Human Malaria Parasite *Plasmodium falciparum*. *Cell* 171, 1532–1544.e15 (2017).
16. Pollitt, L. C., Mideo, N., Drew, D. R., Schneider, P., Colegrave, N. & Reece, S. E. Competition and the evolution of reproductive restraint in malaria parasites. *The American Naturalist* 177, 358–367 (2011).
17. Joice, R., Nilsson, S. K., Montgomery, J., Dankwa, S., Egan, E., Morahan, B., Seydel, K. B., Bertuccini, L., Alano, P., Williamson, K. C., Duraisingh, M. T., Taylor, T. E., Milner, D. A. & Marti, M. *Plasmodium falciparum* transmission stages accumulate in the human bone marrow. *Science Translational Medicine* 6, 244re5–244re5 (2014).
18. Venugopal, K., Hentzschel, F., Valkiūnas, G. & Marti, M. *Plasmodium* asexual growth and sexual development in the haematopoietic niche of the host. *Nat Rev Micro* 18, 177–189 (2020).
19. Gulati, S., Ekland, E. H., Ruggles, K. V., Chan, R. B., Jayabalasingham, B., Zhou, B., Mantel, P.-Y., Lee, M. C. S., Spottiswoode, N., Coburn-Flynn, O., Hjelmqvist, D., Worgall, T. S., Marti, M., Di Paolo, G. & Fidock, D. A. Profiling the Essential Nature of Lipid Metabolism in Asexual Blood and Gametocyte Stages of *Plasmodium falciparum*. *Cell Host Microbe* 18, 371–381 (2015).
20. Wein, S., Ghezal, S., Bure, C., Maynadier, M., Perigaud, C., Vial, H. J., Lefebvre-Tournier, I., Wengelnik, K. & Cerdan, R. Contribution of the precursors and interplay of the pathways in the phospholipid metabolism of the malaria parasite. *J. Lipid Res.* 59, 1461–1471 (2018).

- 1 21. Kilian, N., Choi, J.-Y., Voelker, D. R. & Ben Mamoun, C. Role of phospholipid synthesis in the development and differentiation  
2 of malaria parasites in the blood. *Journal of Biological Chemistry* 293, 17308–17316 (2018).
- 3 22. Garg, A., Lukk, T., Kumar, V., Choi, J.-Y., Augagneur, Y., Voelker, D. R., Nair, S. & Ben Mamoun, C. Structure, function and  
4 inhibition of the phosphoethanolamine methyltransferases of the human malaria parasites *Plasmodium vivax* and  
5 *Plasmodium knowlesi*. *Sci. Rep.* 5, 9064–13 (2015).
- 6 23. Witola, W. H. & Ben Mamoun, C. Choline induces transcriptional repression and proteasomal degradation of the malarial  
7 phosphoethanolamine methyltransferase. *Eukaryotic Cell* 6, 1618–1624 (2007).
- 8 24. Ye, C., Sutter, B. M., Wang, Y., Kuang, Z. & Tu, B. P. A Metabolic Function for Phospholipid and Histone Methylation. *Molecular*  
9 *Cell* 66, 180–193.e8 (2017).
- 10 25. Prommana, P., Uthaiipull, C., Wongsombat, C., Kamchonwongpaisan, S., Yuthavong, Y., Knuepfer, E., Holder, A. A. & Shaw, P.  
11 J. Inducible Knockdown of Plasmodium Gene Expression Using the glmS Ribozyme. *PLoS ONE* 8, e73783 (2013).
- 12 26. Warrenfeltz, S., Basenko, E. Y., Crouch, K., Harb, O. S., Kissinger, J. C., Roos, D. S., Shanmugasundram, A. & Silva-Franco, F.  
13 EuPathDB: The Eukaryotic Pathogen Genomics Database Resource. *Methods Mol Biol* 1757, 69–113 (2018).
- 14 27. Dechamps, S., Maynadier, M., Wein, S., Gannoun-Zaki, L., Maréchal, E. & Vial, H. J. Rodent and nonrodent malaria parasites  
15 differ in their phospholipid metabolic pathways. *J. Lipid Res.* 51, 81–96 (2010).
- 16 28. Mentch, S. J., Mehrmohamadi, M., Huang, L., Liu, X., Gupta, D., Mattocks, D., Gómez Padilla, P., Ables, G., Bamman, M. M.,  
17 Thalacker-Mercer, A. E., Nichenametla, S. N. & Locasale, J. W. Histone Methylation Dynamics and Gene Regulation Occur  
18 through the Sensing of One-Carbon Metabolism. *Cell Metabolism* 22, 861–873 (2015).
- 19 29. Li, S., Swanson, S. K., Gogol, M., Florens, L., Washburn, M. P., Workman, J. L. & Suganuma, T. Serine and SAM Responsive  
20 Complex SESAME Regulates Histone Modification Crosstalk by Sensing Cellular Metabolism. *Molecular Cell* 60, 408–421  
21 (2015).
- 22 30. Shyh-Chang, N., Locasale, J. W., Lyssiotis, C. A., Zheng, Y., Teo, R. Y., Ratanasirintrao, S., Zhang, J., Onder, T., Unternaehrer,  
23 J. J., Zhu, H., Asara, J. M., Daley, G. Q. & Cantley, L. C. Influence of threonine metabolism on S-adenosylmethionine and  
24 histone methylation. *Science* 339, 222–226 (2013).
- 25 31. Ye, C., Sutter, B. M., Wang, Y., Kuang, Z., Zhao, X., Yu, Y. & Tu, B. P. Demethylation of the Protein Phosphatase PP2A Promotes  
26 Demethylation of Histones to Enable Their Function as a Methyl Group Sink. *Molecular Cell* 73, 1115–1126.e6 (2019).
- 27 32. Sutter, B. M., Wu, X., Laxman, S. & Tu, B. P. Methionine inhibits autophagy and promotes growth by inducing the SAM-  
28 responsive methylation of PP2A. *Cell* 154, 403–415 (2013).
- 29 33. Morillo, R. C., Harris, C. T., Kennedy, K., Henning, S. R. & Kafsack, B. F. Genome-wide profiling of histone modifications in  
30 *Plasmodium falciparum* using CUT&RUN. *Life Sci Alliance* 6, (2023).
- 31 34. Salcedo-Amaya, A. M., van Driel, M. A., Alako, B. T., Trelle, M. B., van den Elzen, A. M. G., Cohen, A. M., Janssen-Megens, E.  
32 M., van de Vegte-Bolmer, M., Selzer, R. R., Iniguez, A. L., Green, R. D., Sauerwein, R. W., Jensen, O. N. & Stunnenberg, H. G.  
33 Dynamic histone H3 epigenome marking during the intraerythrocytic cycle of *Plasmodium falciparum*. *Proceedings of the*  
34 *National Academy of Sciences* 106, 9655–9660 (2009).
- 35 35. Karmodiya, K., Pradhan, S. J., Joshi, B., Jangid, R., Reddy, P. C. & Galande, S. A comprehensive epigenome map of *Plasmodium*  
36 *falciparum* reveals unique mechanisms of transcriptional regulation and identifies H3K36me2 as a global mark of gene  
37 suppression. *Epigenetics & Chromatin* 8, 32 (2015).
- 38 36. Reguera, R. M., Redondo, C. M., Pérez-Pertejo, Y. & Balaña-Fouce, R. S-Adenosylmethionine in protozoan parasites: functions,  
39 synthesis and regulation. *Mol Biochem Parasitol* 152, 1–10 (2007).
- 40 37. Luo, M. Chemical and Biochemical Perspectives of Protein Lysine Methylation. *Chem Rev* 118, 6656–6705 (2018).
- 41 38. Bujnicki, J. M., Prigge, S. T., Caridha, D. & Chiang, P. K. Structure, evolution, and inhibitor interaction of S-adenosyl-L-  
42 homocysteine hydrolase from *Plasmodium falciparum*. *Proteins: Structure, Function, and Bioinformatics* 52, 624–632 (2003).
- 43 39. Chiang, P. K. Biological effects of inhibitors of S-adenosylhomocysteine hydrolase. *Pharmacol Ther* 77, 115–134 (1998).
- 44 40. Beri, D., Balan, B., Chaubey, S., Subramaniam, S., Surendra, B. & Tatu, U. A disrupted transsulphuration pathway results in  
45 accumulation of redox metabolites and induction of gametocytogenesis in malaria. *Sci. Rep.* 7, 40213 (2017).
- 46 41. Tibúrcio, M., Niang, M., Deplaine, G., Perrot, S., Bischoff, E., Ndour, P. A., Silvestrini, F., Khattab, A., Milon, G., David, P. H.,  
47 Hardeman, M., Vernick, K. D., Sauerwein, R. W., Preiser, P. R., Mercereau-Puijalon, O., Buffet, P., Alano, P. & Lavazec, C. A  
48 switch in infected erythrocyte deformability at the maturation and blood circulation of *Plasmodium falciparum* transmission  
49 stages. *Blood* 119, e172–80 (2012).
- 50 42. Neveu, G., Richard, C., Dupuy, F., Behera, P., Volpe, F., Subramani, P. A., Marcel-Zerrougui, B., Vallin, P., Andrieu, M., Minz, A.  
51 M., Azar, N., Martins, R. M., Lorthiois, A., Gazeau, F., Lopez-Rubio, J. J., Mazier, D., Silva, A. K. A., Satpathi, S., Wassmer, S. C.,  
52 Verdier, F. & Lavazec, C. *Plasmodium falciparum* sexual parasites develop in human erythroblasts and affect erythropoiesis.  
53 *Blood* 136, 1381–1393 (2020).
- 54 43. Trager, W. & Gill, G. S. Enhanced gametocyte formation in young erythrocytes by *Plasmodium falciparum* in vitro. *J. Protozool.*  
55 39, 429–432 (1992).
- 56 44. Trager, W., GILL, G. S., Lawrence, C. & Nagel, R. L. *Plasmodium falciparum*: Enhanced gametocyte formation in vitro in  
57 reticulocyte-rich blood. *Experimental Parasitology* 91, 115–118 (1999).

- 1 45. Hentzschel, F., Gibbins, M. P., Attipa, C., Beraldi, D., Moxon, C. A., Otto, T. D. & Marti, M. Host cell maturation modulates  
2 parasite invasion and sexual differentiation in *Plasmodium berghei*. *Science advances* 8, eabm7348 (2022).
- 3 46. Percy, A. K., Schmell, E., Earles, B. J. & Lennarz, W. J. Phospholipid Biosynthesis in the Membranes of Immature and Mature  
4 Red Blood Cells. *Biochemistry* 12, 2456–2461 (1973).
- 5 47. Huang, N. J., Lin, Y. C., Lin, C. Y., Pishesha, N., Lewis, C. A., Freinkman, E., Farquharson, C., Millán, J. L. & Lodish, H. Enhanced  
6 phosphocholine metabolism is essential for terminal erythropoiesis. *Blood* 131, 2955–2966 (2018).
- 7 48. Otto, T. D., Böhme, U., Jackson, A. P., Hunt, M., Franke-Fayard, B., Hoeijmakers, W. A. M., Religa, A. A., Robertson, L., Sanders,  
8 M., Ogun, S. A., Cunningham, D., Erhart, A., Billker, O., Khan, S. M., Stunnenberg, H. G., Langhorne, J., Holder, A. A., Waters, A.  
9 P., Newbold, C. I., Pain, A., Berriman, M. & Janse, C. J. A comprehensive evaluation of rodent malaria parasite genomes and  
10 gene expression. *BMC Biol* 12, 359 (2014).
- 11 49. Fougère, A., Jackson, A. P., Paraskevi Bechtsi, D., Braks, J. A. M., Annoura, T., Fonager, J., Spaccapelo, R., Ramesar, J.,  
12 Chevalley-Maurel, S., Klop, O., van der Laan, A. M. A., Tanke, H. J., Kocken, C. H. M., Pasini, E. M., Khan, S. M., Böhme, U., van  
13 Ooij, C., Otto, T. D., Janse, C. J. & Franke-Fayard, B. Variant Exported Blood-Stage Proteins Encoded by *Plasmodium* Multigene  
14 Families Are Expressed in Liver Stages Where They Are Exported into the Parasitophorous Vacuole. *PLoS Pathog* 12, e1005917  
15 (2016).
- 16 50. McLean, K. J., Straimer, J., Hopp, C. S., Vega-Rodríguez, J., Small-Saunders, J. L., Kanatani, S., Tripathi, A., Mlambo, G.,  
17 Dumoulin, P. C., Harris, C. T., Tong, X., Shears, M. J., Ankarklev, J., Kafsack, B. F. C., Fidock, D. A. & Sillis, P. Generation of  
18 Transmission-Competent Human Malaria Parasites with Chromosomally-Integrated Fluorescent Reporters. *Sci. Rep.* 9, 1–10  
19 (2019).
- 20 51. Moll, K., Ljungström, I., Perlmann, H. & Scherf, A. Methods in malaria research. *Manassas* (2008).
- 21 52. Ballinger, E., Mosior, J., Hartman, T., Burns-Huang, K., Gold, B., Morris, R., Goullieux, L., Blanc, I., Vaubourgeix, J., Lagrange, S.,  
22 Fraisse, L., Sans, S., Couturier, C., Bacqué, E., Rhee, K., Scarry, S. M., Aubé, J., Yang, G., Ouerfelli, O., Schnappinger, D., Ioerger,  
23 T. R., Engelhart, C. A., McConnell, J. A., McAulay, K., Fay, A., Roubert, C., Sacchettini, J. & Nathan, C. Opposing reactions in  
24 coenzyme A metabolism sensitize *Mycobacterium tuberculosis* to enzyme inhibition. *Science* 363, (2019).
- 25 53. Skene, P. J., Henikoff, J. G. & Henikoff, S. Targeted in situ genome-wide profiling with high efficiency for low cell numbers.  
26 *Nature Protocols* 13, 1006–1019 (2018).
- 27 54. Bolger, A. M., Lohse, M. & Usadel, B. Trimmomatic: a flexible trimmer for Illumina sequence data. *Bioinformatics* 30, 2114–  
28 2120 (2014).
- 29 55. Li, H. & Durbin, R. Fast and accurate short read alignment with Burrows-Wheeler transform. - PubMed - NCBI. *Bioinformatics*  
30 25, 1754–1760 (2009).
- 31 56. Li, H., Handsaker, B., Wysoker, A., Fennell, T., Ruan, J., Homer, N., Marth, G., Abecasis, G., Durbin, R. 1000 Genome Project  
32 Data Processing Subgroup. The Sequence Alignment/Map format and SAMtools. *Bioinformatics* 25, 2078–2079 (2009).
- 33 57. Zhang, Y., Liu, T., Meyer, C. A., Eeckhoute, J., Johnson, D. S., Bernstein, B. E., Nussbaum, C., Myers, R. M., Brown, M., Li, W. &  
34 Shirley, X. S. Model-based analysis of ChIP-Seq (MACS). *Genome Biol* 9, R137 (2008).
- 35 58. Quinlan, A. R. & Hall, I. M. BEDTools: a flexible suite of utilities for comparing genomic features. *Bioinformatics* 26, 841–842  
36 (2010).
- 37 59. Lawrence, M., Huber, W., Pagès, H., Aboyoun, P., Carlson, M., Gentleman, R., Morgan, M. T. & Carey, V. J. Software for  
38 Computing and Annotating Genomic Ranges. *PLoS Comput. Biol.* 9, e1003118 (2013).
- 39 60. Hahne, F. & Ivanek, R. in *Methods Mol Biol* 1418, 335–351 (2016).
- 40 61. Huber, W., Carey, V. J., Gentleman, R., Anders, S., Carlson, M., Carvalho, B. S., Bravo, H. C., Davis, S., Gatto, L., Girke, T.,  
41 Gottardo, R., Hahne, F., Hansen, K. D., Irizarry, R. A., Lawrence, M., Love, M. I., MacDonald, J., Obenchain, V., Oleś, A. K.,  
42 Pagès, H., Reyes, A., Shannon, P., Smyth, G. K., Tenenbaum, D., Waldron, L. & Morgan, M. Orchestrating high-throughput  
43 genomic analysis with Bioconductor. *Nat Meth* 12, 115–121 (2015).
- 44

1 **EXTENDED DATA FIGURES:**

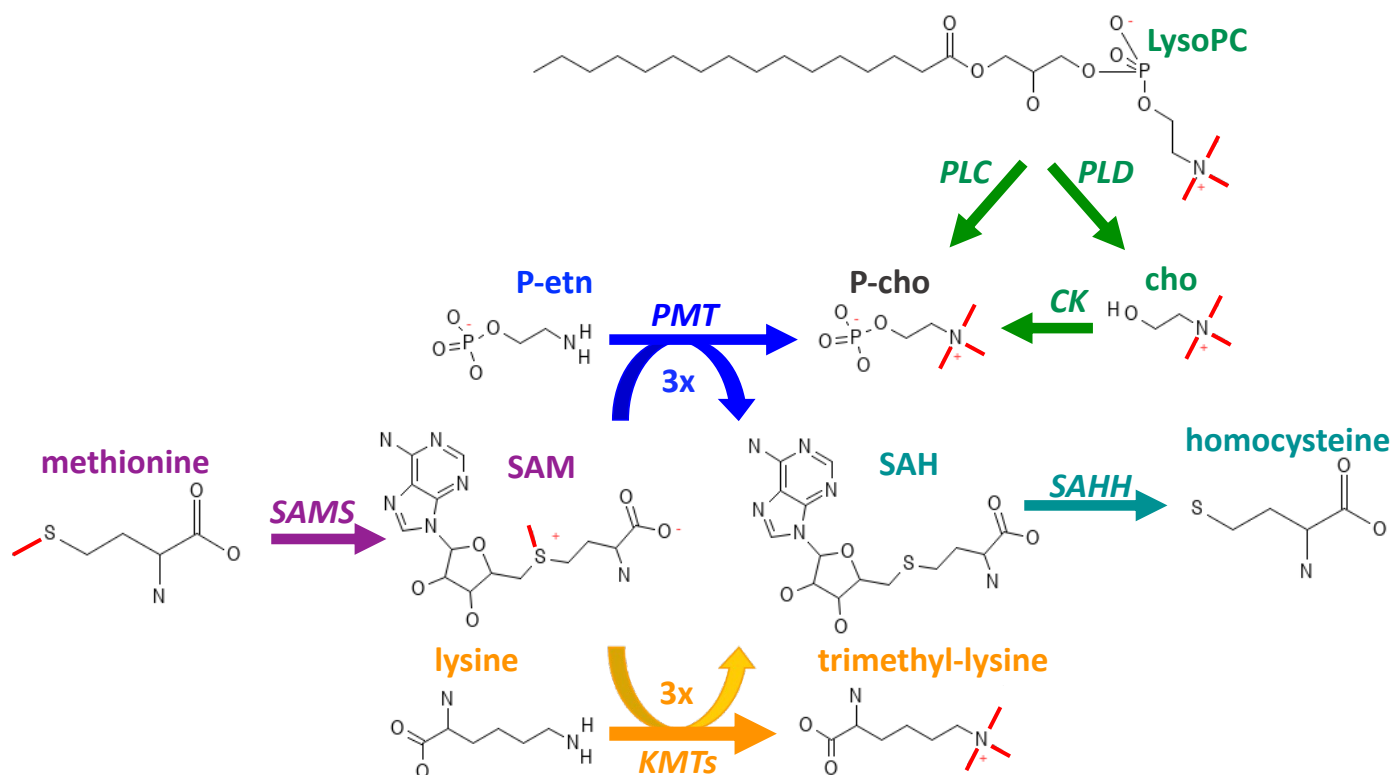

2

3 **Extended Data Figure 1: Central methylation-related metabolites in this study.**

4 Names of enzymes involved in their interconversion are noted in italics and methyl groups being transferred are  
5 highlighted in red.

6



1

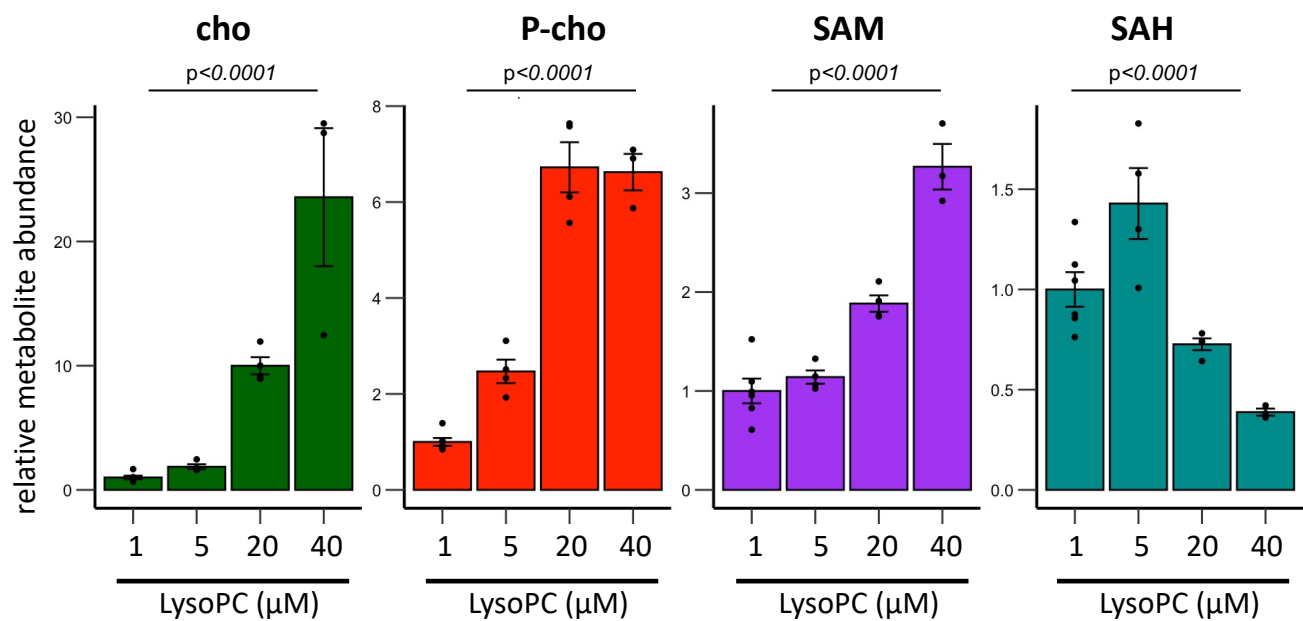

2

### 3 Extended Data Figure 2: Dose-dependent metabolic response to LysoPC.

4 Parasites were cultured in media spiked with increasing concentrations of LysoPC. Bar graphs show the mean  
5 intracellular metabolite abundances per thousand parasites  $\pm$  s.e.m (n=3-5). Italicized numbers are p-values based on  
6 two-sided ANOVA tests.

7

1

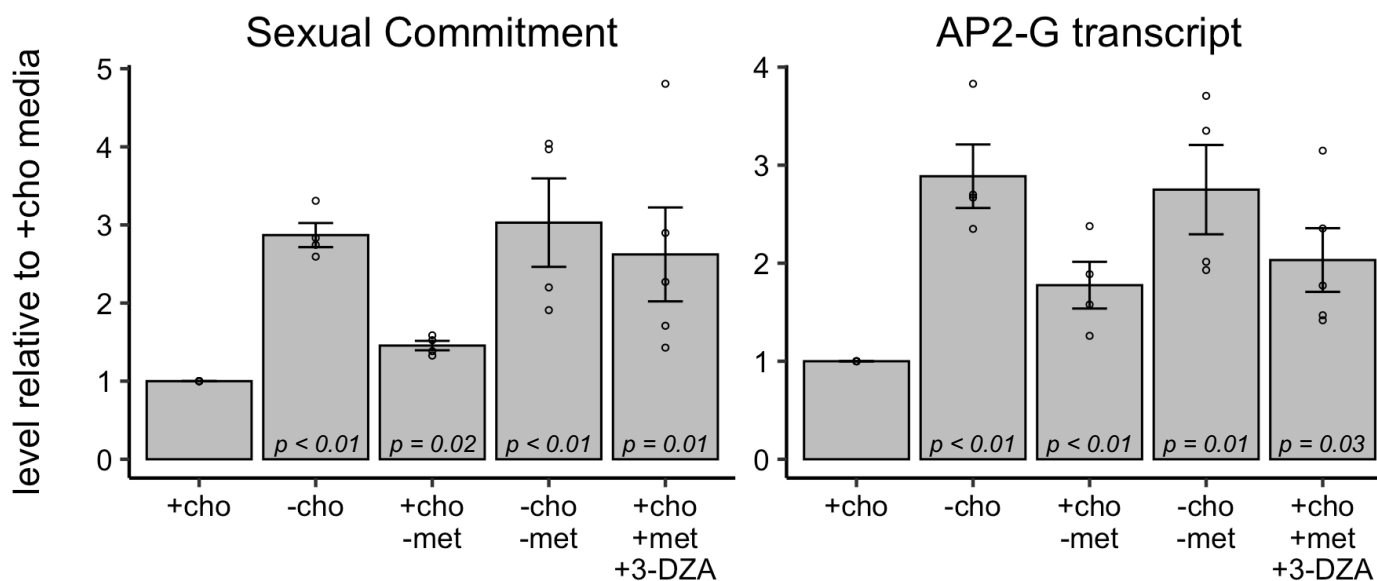

2

3

4

5

6

7

8

9

10

**Extended Data Figure 3. Schizont AP2-G transcript abundances closely track sexual commitment under various nutrient conditions.** Bars indicate the mean sexual commitment (left) and AP2-G transcript abundance (right) in schizonts relative to conditions of abundant choline and methionine (+cho) when parasites were exposed to different growth media during the commitment cycle. Error bars and p-values indicate the standard error of the mean and the significance of the mean difference relative to those under conditions of abundant choline and methionine (+cho+met), respectively. n=4-5.

10

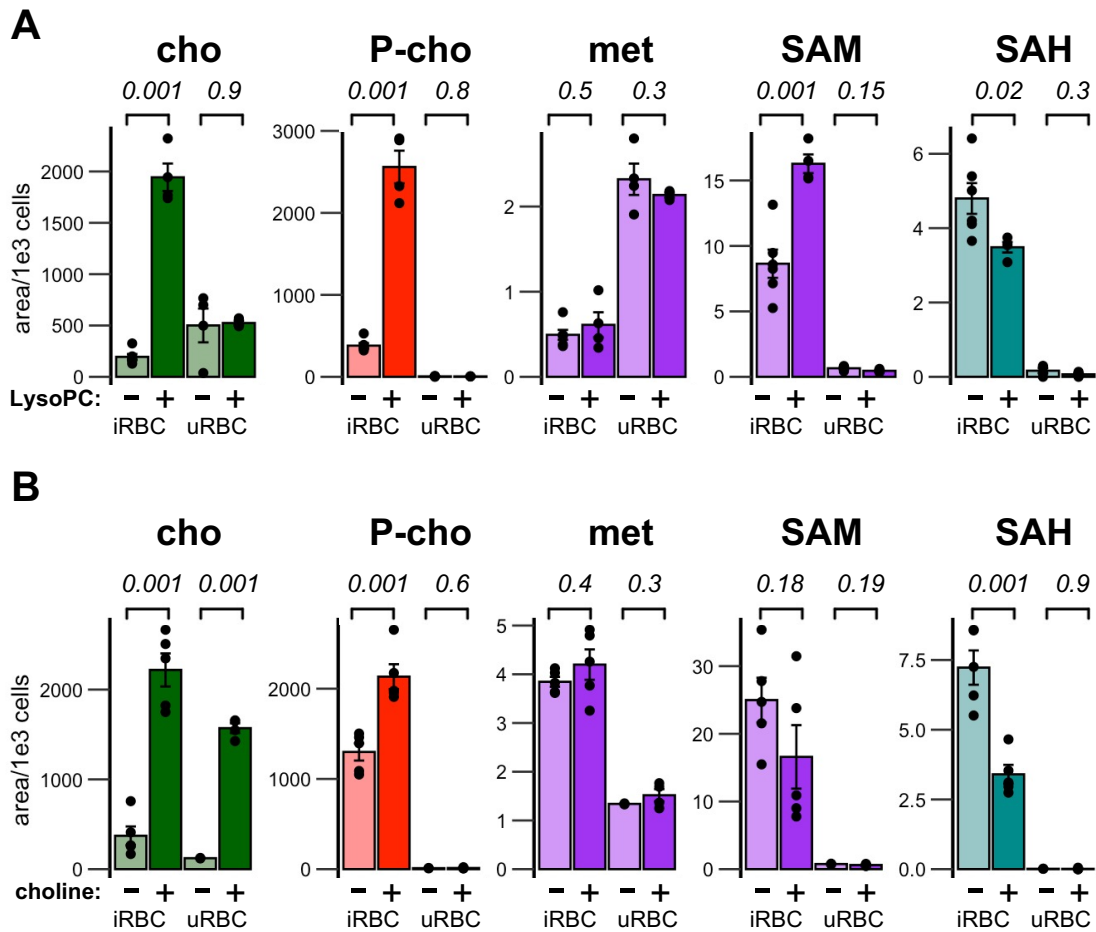

1  
2  
3  
4  
5  
6  
7  
8

**Extended Data Figure 4: Changes in SAM/SAH metabolism are specific to parasite metabolism.**

LCMS quantification of indicated metabolites. Infected and uninfected cultures were cultured in the presence or absence of 20  $\mu$ M LysoPC or 420 $\mu$ M choline for ~36 hpi during the commitment cycle. Infected (iRBC) and uninfected (uRBC) erythrocytes were then extracted, and metabolite abundances were quantified by LCMS. Bar graphs show the mean intracellular metabolite abundances per thousand cells  $\pm$  s.e.m (n=3-5). Italicized numbers are p-values based on two-sided paired t-tests.

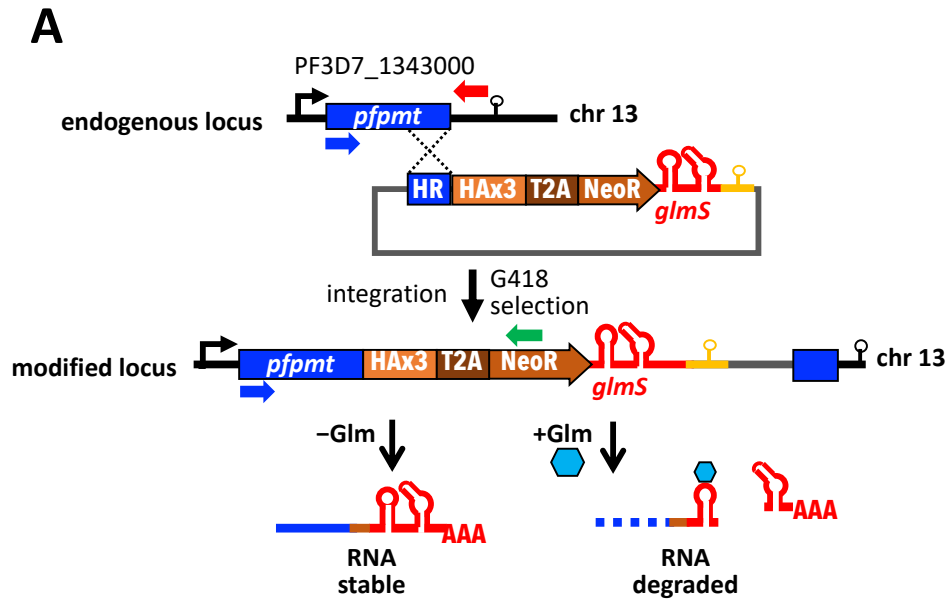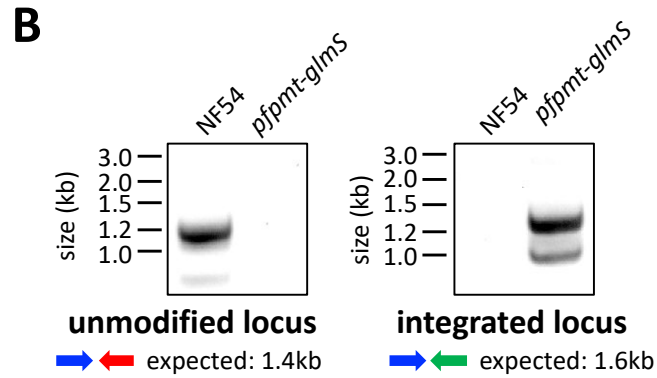

1  
2  
3  
4  
5  
6

**Extended Data Figure 5: Validation of *PMT-glmS* knockdown parasite line.**

**(A)** Generation of *PMT-glmS* knockdown parasites by selection-linked integration. **(B)** Validation PCR demonstrating tagging of the endogenous *PMT* locus.

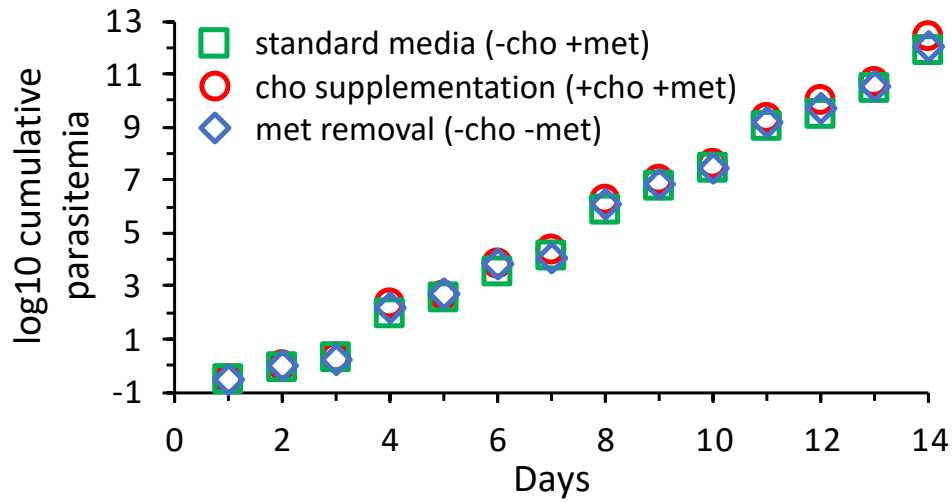

1  
2 **Extended Data Figure 6: Removal of methionine (blue diamond) or supplementation with choline (red circles) had no**  
3 **observable effect on growth of NF54 compared to growth in standard malaria medium (green squares).**  
4  
5  
6  
7

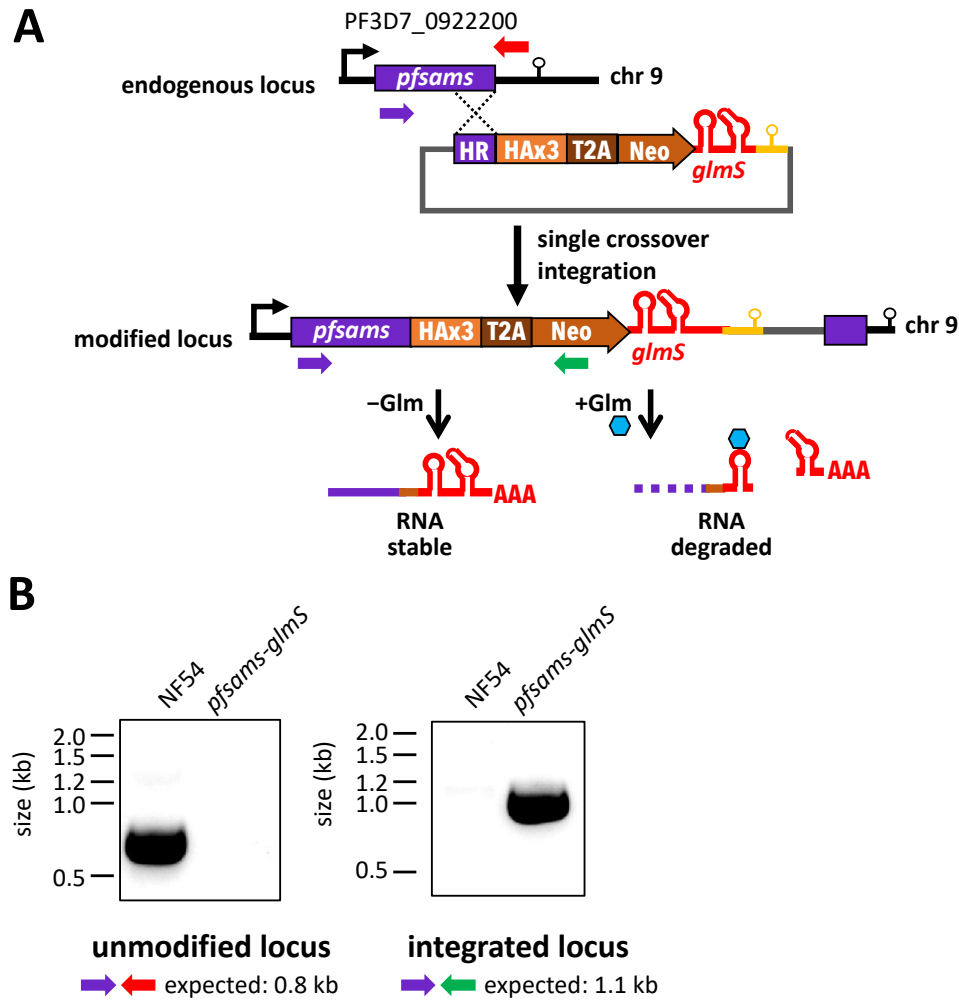

8  
9 **Extended Data Figure 7: Validation of *pfsams-glmS* knockdown parasite line.**  
10 **(A)** Generation of *pfsams-glmS* knockdown parasites by selection-linked integration. **(B)** PCR Validation demonstrating  
11 tagging of the endogenous *pfsams* locus.

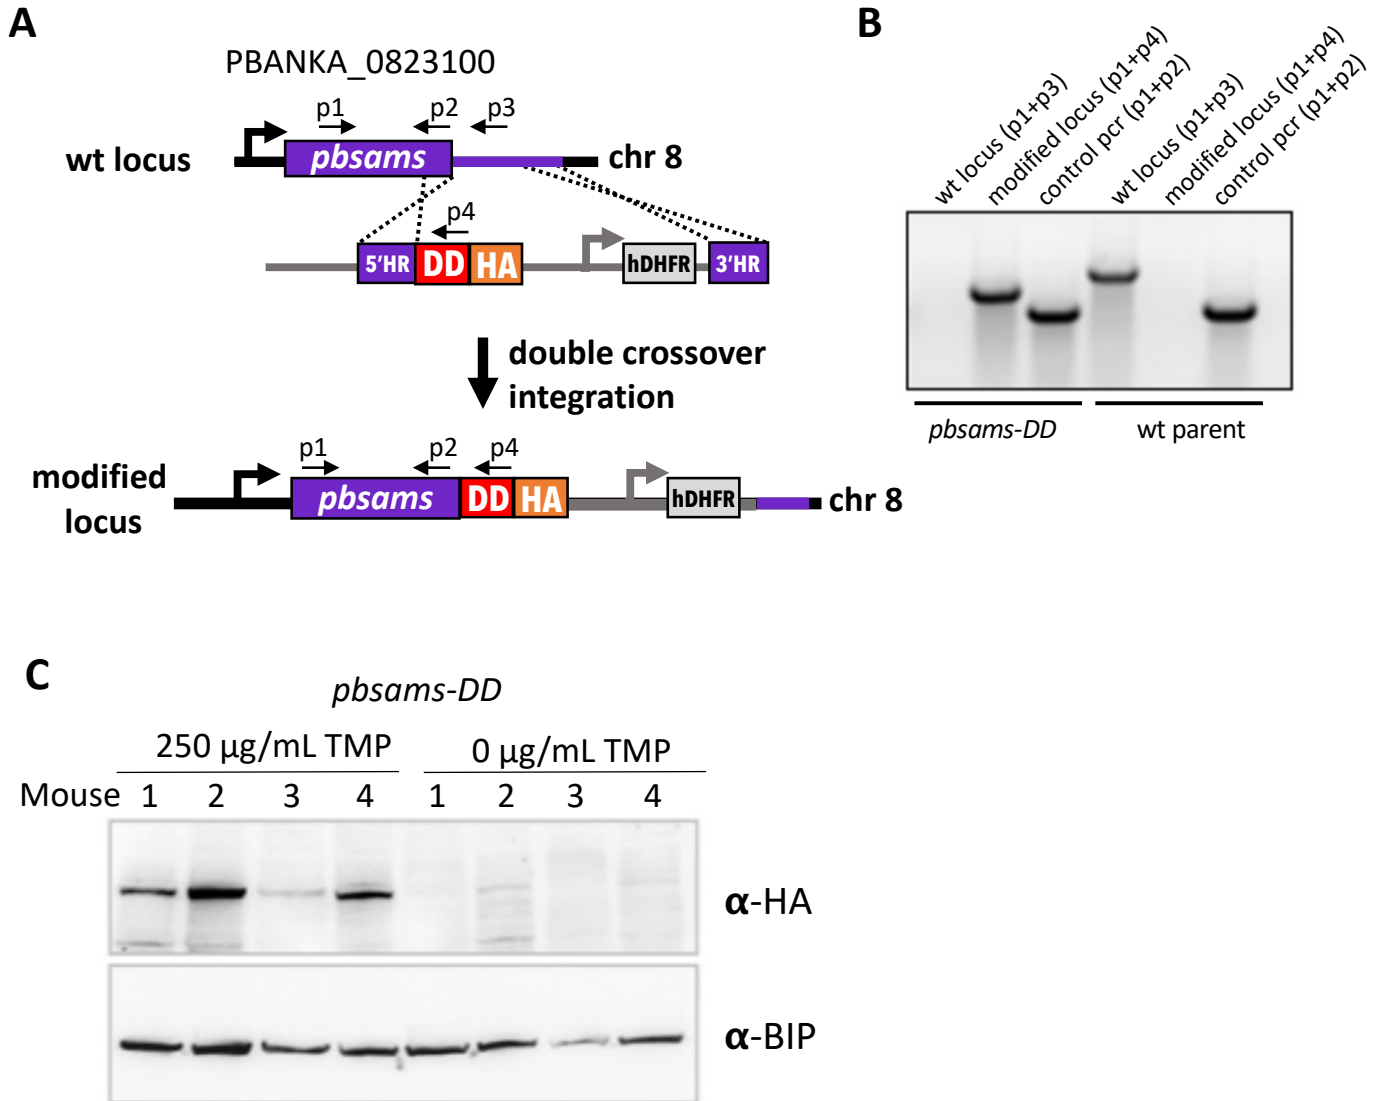

**Extended Data Figure 8: Validation of *pbsams-DD* knockdown parasite line.**

(A) The endogenous *pbsams* locus in the *P. berghei* ANKA strain background was modified by homologous integration to add the ecDHFR destabilization domain (DD) and hemagglutinin epitope tag (HA) at the 3' end of the *pbsams* coding sequence. Simultaneous integration of a hDHFR expression cassette allows for selection of integrants. (B) PCR validation of successful tagging in *PbsSAMS-DD-HA* parasites. (C) Successful knockdown of *PbsSAMS* upon removal of trimethoprim (TMP) from the drinking water in mice infected with *pbsams-DD* parasites. Parasite lysates were assayed for the abundance of *PbsSAMS-DD* with antibodies against the HA epitope tag and *PbBIP*, which served as a loading control and was used for normalization.

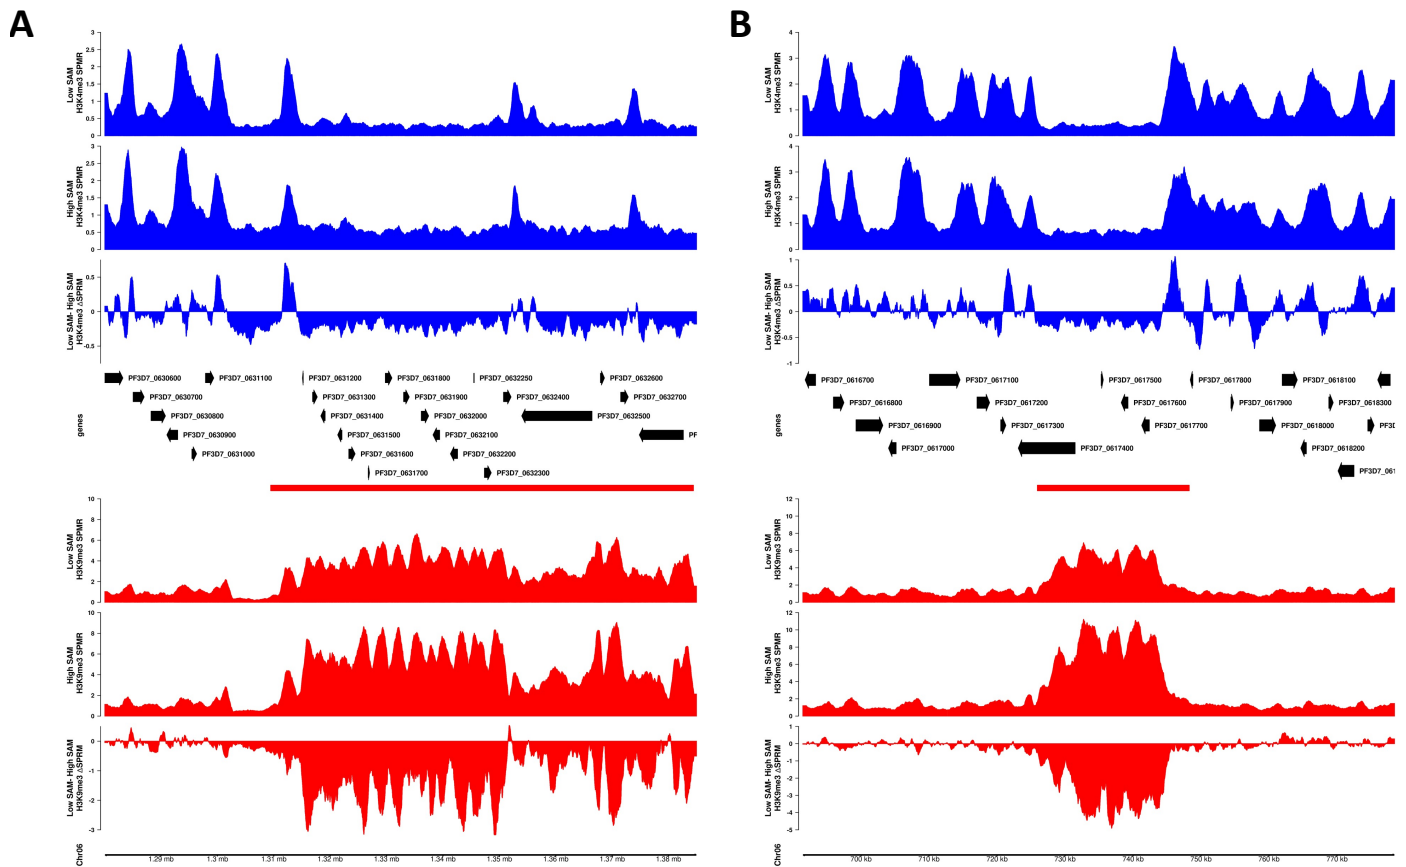

1  
2  
3  
4  
5  
6  
7  
8  
9

**Extended Data Figure 9: Coverage comparisons of H3K4me3 and H3K9me3 at two representative chromosome 6 loci under Low vs. High SAM conditions.**

Coverage of H3K4me3 (blue) and H3K9me3 (red) at representative regions on chromosome 6 that include euchromatin and either subtelomeric heterochromatin (**A**) or a heterochromatin island (**B**) under Low SAM (top track of each color) and High SAM conditions (middle track of each color) and the relative difference in coverage (third track of each color). Heterochromatin regions are marked with a red bar. Coverage was normalized as signal per million reads (SPRM) using macs2.

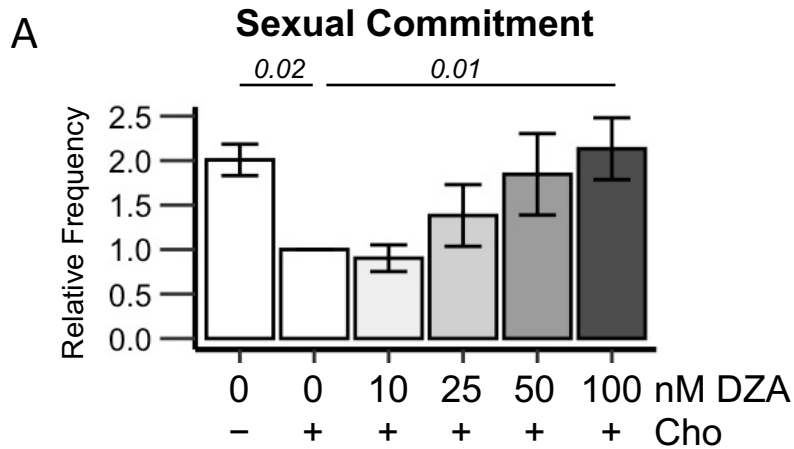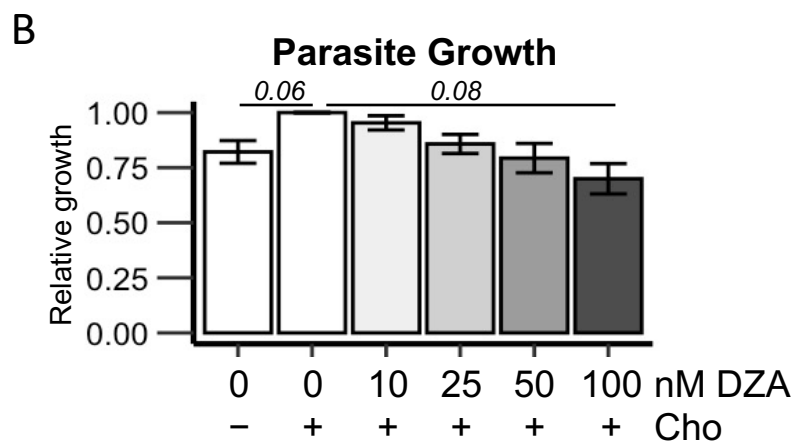

1  
 2 **Extended Data Figure 10: Dose-response of parasite sexual commitment (A) and growth (B) to 3-DZA.**  
 3 Italicized number is the p-value based on a two-sided t-tests for the +/- choline comparison and ANOVA for the DZA  
 4 dose response (n=4).  
 5



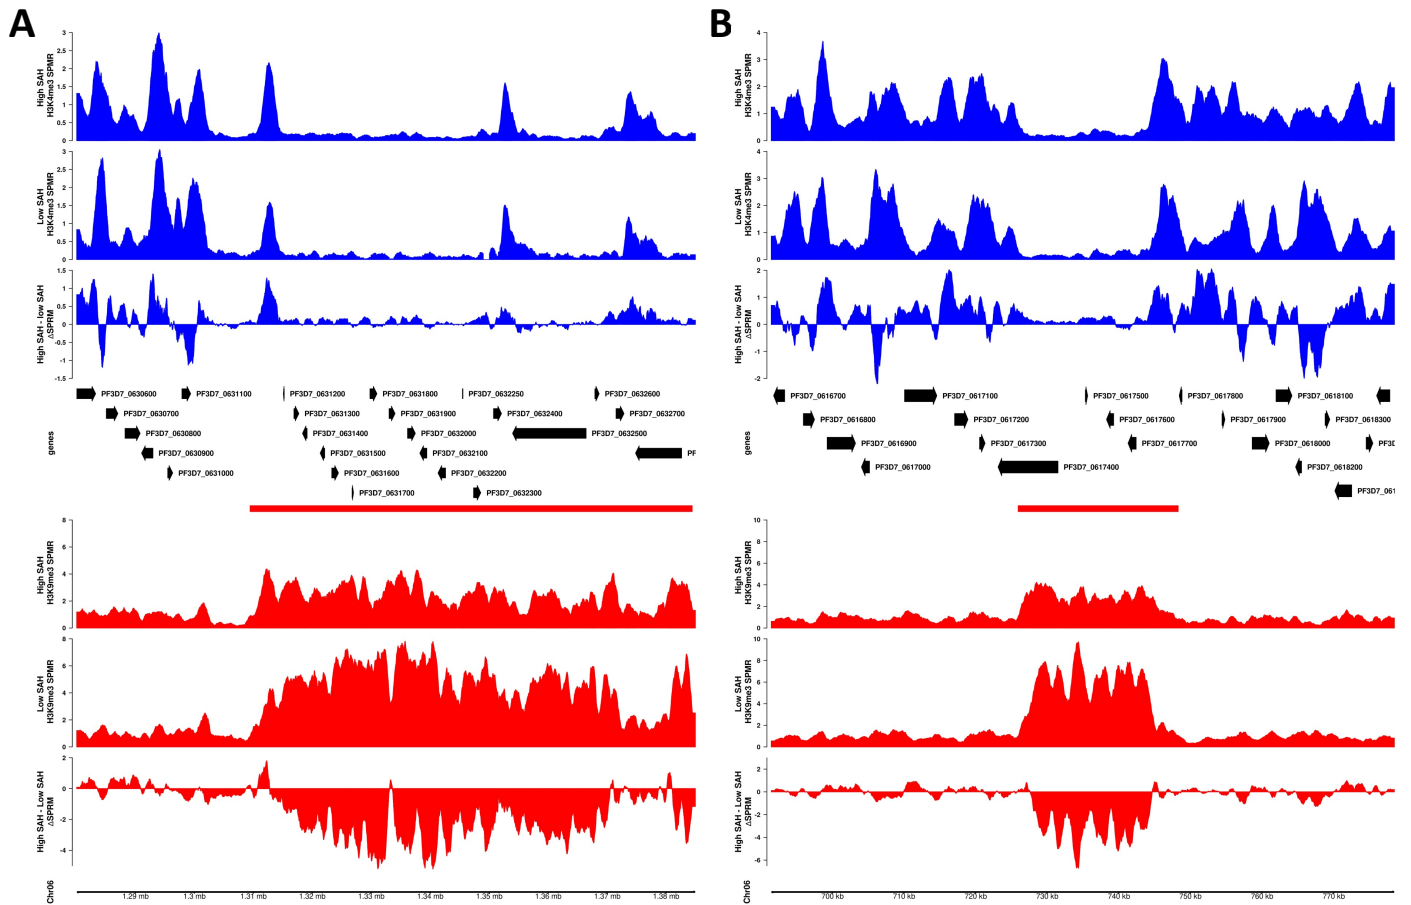

1  
2  
3  
4  
5  
6  
7  
8  
9

**Extended Data Figure 11: Coverage comparisons of H3K4me3 and H3K9me3 at two representative chromosome 6 loci under High vs. Low SAH conditions.** Coverage of H3K4me3 (blue) and H3K9me3 (red) at representative regions on chromosome 6 that include euchromatin and either subtelomeric heterochromatin (**A**) or a heterochromatin island (**B**) under High SAH (top track of each color) and Low SAH conditions (middle track of each color) and the relative difference in coverage (third track of each color). Heterochromatin regions are marked with a red bar. Coverage was normalized as signal per million reads (SPRM) using macs2.

1 **Extended Data Table 1: Compositions of cell culture media used in this study.**

2

| Label    | Differences to standard malaria complete media                                           |
|----------|------------------------------------------------------------------------------------------|
| - cho    | 0 μM choline                                                                             |
| + cho    | 420 μM Choline                                                                           |
| - LysoPC | 30 μM Palmitate, 30 μM oleate, 1.25 μM LysoPC, 4 g/L Fatty Acid Free BSA, no Albumax II, |
| + LysoPC | 30 μM Palmitate, 30 μM oleate, 40 μM LysoPC, 4 g/L Fatty Acid Free BSA, no Albumax II,   |
| - Glm    | none                                                                                     |
| + Glm    | 2.5mM glucosamine                                                                        |
| - met    | 0 μM methionine                                                                          |
| + met    | none (100 μM methionine)                                                                 |
| - 3DZA   | 420 μM Choline                                                                           |
| + 3DZA   | 420 μM Choline, 100nM 3-DZA                                                              |

3

4

5

6

7 **Extended Data Table 2: Primers used in this study**

8

| PrimerID | Sequence                                            | Strand | Purpose                                                                                                           |
|----------|-----------------------------------------------------|--------|-------------------------------------------------------------------------------------------------------------------|
| BKO-1424 | TATGCTGATATTCTTACTGCTTGC                            | F      | qRT-PCR for <i>pfpm</i> transcript                                                                                |
| BKO-1425 | GGACCAGCCATCATCAAGAC                                | R      | qRT-PCR for <i>pfpm</i> transcript                                                                                |
| BKO-1626 | AAGTAGCAGGTCATCGTGGTT                               | F      | qRT-PCR for serine t-RNA ligase                                                                                   |
| BKO-1627 | TTCGGCACATTCTTCATAA                                 | R      | qRT-PCR for serine t-RNA ligase                                                                                   |
| BKO-1004 | ctatagaatactcaagctgcccgcGGAGCACATACTCACGGTATAGAT    | F      | for cloning <i>pfpm</i> homology block for <i>pfpm-glmS</i> tagged line                                           |
| BKO-1005 | ccgggacgtcgtacgggtaccgggATTTTTGGTGGCCTAAAATAACC     | R      | for cloning <i>pfpm</i> homology block for <i>pfpm-glmS</i> tagged line                                           |
| BKO-1002 | ctatagaatactcaagctgcccgcCCTTTACGTGTTACTACTGTTCTTATT | F      | for cloning <i>psams</i> homology block for <i>psams-glmS</i> tagged line                                         |
| BKO-1003 | ccgggacgtcgtacgggtaccgggATTTTTAATGCATTTTTTCGTG      | R      | for cloning <i>psams</i> homology block for <i>psams-glmS</i> tagged line                                         |
| BKO-0750 | TGACTTTGATTGAAAACCTAAAACCTCTG                       | F      | PCR verification of <i>pfpm-glmS</i> line; binds within <i>pfpm</i> CDS upstream of homology region               |
| BKO-1661 | CTGCATATTATGCATCGGGATAC                             | R      | PCR verification of <i>pfpm-glmS</i> line; binds within <i>pfpm</i> 3' UTR                                        |
| BKO-1023 | GTATCTTACCTTATTTAGGACCTGATG                         | F      | PCR verification of <i>psams-glmS</i> ; binds in <i>psams</i> CDS upstream of homology region                     |
| BKO-1009 | ACATTTCTTCTTTCTATTCTCTAAAT                          | R      | PCR verification of genome editing; binds within <i>psams</i> 3' UTR                                              |
| BKO-0217 | AGTGACAACGTCGAGCACAG                                | R      | PCR verification of <i>pfpm-glmS</i> & <i>psams-glmS</i> lines; binds within the neomycin resistance gene         |
| P1       | taggtaccGAGGAAATTTTCTATTACTTCG                      | F      | Validation of <i>psams-dd-ha</i> parasites, binds within <i>psams</i> CDS upstream of homology region             |
| P2       | tagggcccATTTTTAAAACATTTTTTCGTG                      | R      | Validation of <i>psams-dd-ha</i> parasites, binds at 3' end of <i>psams</i> CDS, used as a PCR positive control   |
| P3       | atgcccgcCAACTAATAAAATCCAGGAAATA                     | R      | Validation of <i>psams-dd-ha</i> parasites, binds within <i>psams</i> 3'UTR, downstream of the 3' homology region |
| P4       | taGCGGCCGCTCATCGCCGCTC                              | R      | Validation of <i>psams-dd-ha</i> parasites, binds within the DD CDS sequence                                      |
| BKO-1394 | TGGTGGTAATAAGAACAACAGAGGT                           | F      | qRT-PCR for <i>pfap2-g</i> transcript                                                                             |
| BKO-1395 | CCATCATAATCTTCTTCTTCGTG                             | R      | qRT-PCR for <i>pfap2-g</i> transcript                                                                             |
| BKO-2322 | GGTGTAGTGGCTCACC AATAGGA                            | F      | qRT-PCR for ubiquitin-conjugating enzyme ( <i>pfuce</i> ) transcript                                              |
| BKO-2323 | GTACCACCTCCCATGGAGTA                                | R      | qRT-PCR for ubiquitin-conjugating enzyme ( <i>pfuce</i> ) transcript                                              |

9 Upper case letters indicate the annealing region matching the template

10

11

12
